# Supplementary material for: Pumpkin powdery mildew disease severity influences the fungal diversity of the phyllosphere
Source: PeerJ. 2018 Apr 2;6:e4559. doi: 10.7717/peerj.4559 (PMC5885987; doi:10.7717/peerj.4559)
Supplement: Table S2 [file peerj-06-4559-s004.xlsx]

## Sheet: OTU Table
OTU	Domain	Phylum	Class	Order	Family	Genus	Species	R01	R02	R03	R04	R11	R12	R13	R14	R21	R22	R23	R24	R31	R32	R33	R34
OTU_1	Fungi	Ascomycota	Leotiomycetes	Erysiphales	Erysiphaceae	Podosphaera	Podosphaera_fusca|SH194415.06FU	765	484	470	460	1008	224	70	566	2909	3944	7140	5691	46896	44773	52368	35841
OTU_2	Fungi	Fungi_unidentified	Fungi_unidentified_1	Fungi_unidentified_1	Fungi_unidentified_1_1	Fungi_unidentified_1_1	Fungi_sp|SH234328.06FU	40542	34215	38693	27184	17087	26595	31449	23363	27663	21644	33439	25324	5163	6462	6297	9058
OTU_3	Fungi	Fungi_unidentified	Fungi_unidentified_1	Fungi_unidentified_1	Fungi_unidentified_1_1	Fungi_unidentified_1_1	Fungi_sp|SH234328.06FU	7839	11421	13523	7835	5726	4990	7638	8326	6238	4499	8416	4567	941	1288	1212	1781
OTU_4	Fungi	Basidiomycota	Exobasidiomycetes	Exobasidiomycetes_unidentified	Exobasidiomycetes_unidentified_1	Exobasidiomycetes_unidentified_1	Exobasidiomycetes_sp|SH230059.06FU	137	134	36	133	273	1848	455	846	70	522	40	1573	2392	4296	795	1124
OTU_5	Fungi	Fungi_unidentified	Fungi_unidentified_1	Fungi_unidentified_1	Fungi_unidentified_1_1	Fungi_unidentified_1_1	Fungi_sp|SH234328.06FU	1821	1549	1970	1400	783	1225	1522	2017	1368	987	1633	1338	203	254	208	281
OTU_6	Fungi	Ascomycota	Dothideomycetes	Pleosporales	Pleosporaceae	Alternaria	Alternaria_eichhorniae|SH224789.06FU	959	533	478	418	995	751	342	772	599	1818	363	824	467	351	212	239
OTU_7	Fungi	Ascomycota	Dothideomycetes	Dothideales	Dothioraceae	Aureobasidium	Aureobasidium_sp|SH206630.06FU	99	43	87	404	4055	1953	265	712	59	471	62	709	163	84	50	109
OTU_8	Fungi	Unclassified	Unclassified	Unclassified	Unclassified	Unclassified	Unclassified	256	47	50	429	2646	1741	970	1195	29	364	40	394	74	124	44	172
OTU_9	Fungi	Fungi_unidentified	Fungi_unidentified_1	Fungi_unidentified_1	Fungi_unidentified_1_1	Fungi_unidentified_1_1	Fungi_sp|SH234328.06FU	449	1994	2286	759	672	254	772	1480	603	175	528	237	0	49	43	11
OTU_10	Fungi	Ascomycota	Dothideomycetes	Capnodiales	Davidiellaceae	Davidiella	Davidiella_tassiana|SH196750.06FU	430	200	884	253	1039	814	887	170	524	743	91	564	205	141	64	110
OTU_11	Fungi	Ascomycota	Sordariomycetes	Hypocreales	Cordycipitaceae	Cordycipitaceae_unidentified	Cordycipitaceae_sp|SH235767.06FU	3	6	8	4	3	2	1	2	3232	1	1	4	0	0	0	0
OTU_12	Fungi	Ascomycota	Dothideomycetes	Pleosporales	Incertae_sedis_13	Leptosphaerulina	Leptosphaerulina_chartarum|SH227423.06FU	158	105	112	189	823	457	114	435	100	117	43	169	48	28	15	35
OTU_13	Fungi	Basidiomycota	Ustilaginomycetes	Ustilaginales	Ustilaginaceae	Pseudozyma	Pseudozyma_sp_Vega417|SH241684.06FU	23	17	79	16	253	30	315	77	123	193	179	414	49	376	83	238
OTU_14	Fungi	Ascomycota	Eurotiomycetes	Chaetothyriales	Incertae_sedis_42	Strelitziana	Strelitziana_mali|SH211991.06FU	40	9	20	55	396	423	129	414	9	50	8	44	15	19	7	35
OTU_15	Fungi	Basidiomycota	Exobasidiomycetes	Exobasidiomycetes_unidentified	Exobasidiomycetes_unidentified_1	Exobasidiomycetes_unidentified_1	Exobasidiomycetes_sp|SH199847.06FU	171	169	62	63	57	83	26	15	18	44	6	29	382	597	99	146
OTU_16	Fungi	Basidiomycota	Exobasidiomycetes	Exobasidiomycetes_unidentified	Exobasidiomycetes_unidentified_1	Exobasidiomycetes_unidentified_1	Exobasidiomycetes_sp|SH230059.06FU	50	58	21	30	74	122	28	120	13	98	11	136	223	308	76	106
OTU_17	Fungi	Ascomycota	Dothideomycetes	Pleosporales	Incertae_sedis_13	Periconia	Periconia_sp|SH232015.06FU	126	152	199	142	529	290	221	275	69	346	114	342	33	63	41	56
OTU_18	Fungi	Ascomycota	Eurotiomycetes	Chaetothyriales	Chaetothyriales_unidentified	Chaetothyriales_unidentified_1	Chaetothyriales_sp|SH201524.06FU	122	24	28	174	764	371	229	190	25	190	21	287	18	31	18	30
OTU_19	Fungi	Ascomycota	Dothideomycetes	Pleosporales	Incertae_sedis_13	Phoma	Phoma_microchlamydospora|SH197540.06FU	43	37	57	36	52	1	25	190	110	54	75	115	21	10	27	20
OTU_20	Fungi	Basidiomycota	Microbotryomycetes	Sporidiobolales	Incertae_sedis_25	Rhodotorula	Rhodotorula_sp_YM24636|SH227561.06FU	82	26	25	169	163	1	47	12	30	139	31	93	26	9	8	42
OTU_21	Fungi	Basidiomycota	Agaricomycetes	Agaricales	Agaricales_unidentified	Agaricales_unidentified_1	Agaricales_sp|SH239393.06FU	105	101	140	38	109	74	41	28	47	59	26	45	12	14	6	18
OTU_22	Fungi	Ascomycota	Leotiomycetes	Helotiales	Helotiales_unidentified	Helotiales_unidentified_1	Helotiales_sp|SH191096.06FU	5	6	10	12	48	7	13	228	38	4	9	96	13	54	46	76
OTU_23	Fungi	Ascomycota	Dothideomycetes	Pleosporales	Pleosporales_unidentified	Pleosporales_unidentified_1	Pleosporales_sp|SH206981.06FU	71	52	42	27	100	55	43	74	31	177	39	80	41	49	33	32
OTU_24	Fungi	Ascomycota	Eurotiomycetes	Chaetothyriales	Chaetothyriales_unidentified	Chaetothyriales_unidentified_1	Chaetothyriales_sp|SH232791.06FU	5	3	3	6	16	4	4	195	41	2	48	33	12	21	54	12
OTU_25	Fungi	Ascomycota	Dothideomycetes	Botryosphaeriales	Aplosporellaceae	Aplosporella	Unclassified	89	9	100	19	206	28	35	38	5	5	2	6	4	0	0	0
OTU_26	Fungi	Ascomycota	Sordariomycetes	Xylariales	Amphisphaeriaceae	Pestalotiopsis	Pestalotiopsis_rhododendri|SH210426.06FU	7	12	13	18	40	12	18	97	6	79	10	35	1	2	0	7
OTU_27	Fungi	Fungi_unidentified	Fungi_unidentified_1	Fungi_unidentified_1	Fungi_unidentified_1_1	Fungi_unidentified_1_1	Fungi_sp|SH201526.06FU	12	8	13	16	61	44	85	162	9	146	9	249	9	11	15	21
OTU_28	Fungi	Ascomycota	Dothideomycetes	Pleosporales	Phaeosphaeriaceae	Ampelomyces	Ampelomyces_quisqualis|SH222876.06FU	45	51	3	5	0	0	0	0	0	0	0	0	125	154	25	39
OTU_29	Fungi	Ascomycota	Ascomycota_unidentified	Ascomycota_unidentified_1	Ascomycota_unidentified_1	Ascomycota_unidentified_1_1	Ascomycota_sp|SH224125.06FU	0	1	0	1	0	0	0	2	1	268	0	4	0	0	0	0
OTU_30	Fungi	Ascomycota	Dothideomycetes	Capnodiales	Teratosphaeriaceae	Devriesia	Unclassified	40	7	76	35	73	23	9	9	19	29	10	24	6	5	8	4
OTU_31	Fungi	Ascomycota	Dothideomycetes	Pleosporales	Incertae_sedis_13	Phoma	Phoma_aff_macrostoma_BBA_72146|SH202148.06FU	23	13	15	14	25	1	16	94	18	15	8	41	10	4	3	6
OTU_32	Fungi	Ascomycota	Eurotiomycetes	Chaetothyriales	Chaetothyriales_unidentified	Chaetothyriales_unidentified_1	Chaetothyriales_sp|SH201524.06FU	16	3	4	13	78	38	16	22	2	19	4	17	3	3	4	3
OTU_33	Fungi	Basidiomycota	Agaricomycetes	Russulales	Peniophoraceae	Peniophora	Peniophora_sp_JY_035|SH234595.06FU	83	95	95	47	162	99	40	37	107	35	23	81	11	8	8	13
OTU_34	Fungi	Ascomycota	Sordariomycetes	Hypocreales	Unclassified	Unclassified	Unclassified	3	108	4	0	2	55	0	4	14	4	26	4	0	0	2	0
OTU_35	Fungi	Ascomycota	Dothideomycetes	Pleosporales	Phaeosphaeriaceae	Phaeosphaeriaceae_unidentified	Phaeosphaeriaceae_sp|SH213437.06FU	24	21	14	8	30	1	19	57	8	51	10	26	7	9	5	11
OTU_36	Fungi	Ascomycota	Eurotiomycetes	Chaetothyriales	Unclassified	Unclassified	Unclassified	6	5	3	5	15	11	9	25	8	32	9	7	14	19	19	5
OTU_37	Fungi	Ascomycota	Eurotiomycetes	Eurotiales	Trichocomaceae	Penicillium	Penicillium_sp|SH193634.06FU	3	5	3	3	38	29	314	8	3	29	0	8	1	2	1	3
OTU_38	Fungi	Ascomycota	Dothideomycetes	Botryosphaeriales	Botryosphaeriaceae	Neodeightonia	Neodeightonia_palmicola|SH236115.06FU	7	7	11	8	30	31	6	12	8	25	11	6	2	5	9	5
OTU_39	Fungi	Fungi_unidentified	Fungi_unidentified_1	Fungi_unidentified_1	Fungi_unidentified_1_1	Fungi_unidentified_1_1	Fungi_sp|SH234328.06FU	4	31	35	16	10	2	13	24	4	0	10	2	0	4	1	1
OTU_40	Fungi	Ascomycota	Dothideomycetes	Capnodiales	Mycosphaerellaceae	Mycosphaerella	Mycosphaerella_gregaria|SH235741.06FU	7	7	3	5	16	9	8	21	3	33	8	17	5	7	2	4
OTU_41	Fungi	Ascomycota	Eurotiomycetes	Chaetothyriales	Herpotrichiellaceae	Exophiala	Exophiala_brunnea|SH230205.06FU	10	4	9	23	184	3	16	8	13	78	23	24	7	5	0	2
OTU_42	Fungi	Basidiomycota	Exobasidiomycetes	Microstromatales	Incertae_sedis_43	Jaminaea	Jaminaea_angkoriensis|SH233453.06FU	10	8	5	7	20	18	13	1	6	40	3	8	8	7	0	7
OTU_43	Fungi	Ascomycota	Dothideomycetes	Dothideomycetes_unidentified	Dothideomycetes_unidentified_1	Dothideomycetes_unidentified_1	Dothideomycetes_sp|SH224798.06FU	3	1	4	1	0	3	0	99	2	6	2	5	0	0	4	0
OTU_44	Fungi	Ascomycota	Dothideomycetes	Pleosporales	Leptosphaeriaceae	Coniothyrium	Coniothyrium_sp_JK27|SH233607.06FU	3	8	7	3	28	7	8	21	3	79	2	33	9	12	1	9
OTU_45	Fungi	Fungi_unidentified	Fungi_unidentified_1	Fungi_unidentified_1	Fungi_unidentified_1_1	Fungi_unidentified_1_1	Fungi_sp|SH201526.06FU	4	2	6	15	56	28	50	106	3	63	0	48	4	10	8	10
OTU_46	Fungi	Ascomycota	Ascomycota_unidentified	Ascomycota_unidentified_1	Ascomycota_unidentified_1	Ascomycota_unidentified_1_1	Ascomycota_sp|SH194735.06FU	8	12	11	11	19	11	8	12	7	22	4	11	5	6	3	3
OTU_47	Fungi	Ascomycota	Eurotiomycetes	Chaetothyriales	Incertae_sedis_42	Strelitziana	Strelitziana_albiziae|SH211993.06FU	3	3	5	7	15	11	14	46	4	20	2	24	4	4	0	4
OTU_48	Fungi	Ascomycota	Eurotiomycetes	Chaetothyriales	Herpotrichiellaceae	Exophiala	Exophiala_brunnea|SH230205.06FU	3	23	1	4	11	2	4	0	5	57	0	7	1	0	0	1
OTU_49	Fungi	Basidiomycota	Agaricomycetes	Polyporales	Polyporaceae	Trametes	Trametes_hirsuta|SH236971.06FU	17	15	11	7	21	3	6	1	12	10	1	2	0	0	0	2
OTU_50	Fungi	Basidiomycota	Agaricomycetes	Agaricomycetes_unidentified	Agaricomycetes_unidentified_1	Agaricomycetes_unidentified_1	Agaricomycetes_sp|SH205543.06FU	14	19	25	4	32	4	13	9	11	11	6	24	1	5	1	0
OTU_51	Fungi	Ascomycota	Eurotiomycetes	Chaetothyriales	Chaetothyriales_unidentified	Chaetothyriales_unidentified_1	Chaetothyriales_sp|SH201524.06FU	0	0	0	2	5	1	25	34	2	3	0	25	1	1	0	1
OTU_52	Fungi	Ascomycota	Eurotiomycetes	Chaetothyriales	Chaetothyriales_unidentified	Chaetothyriales_unidentified_1	Chaetothyriales_sp|SH219207.06FU	6	3	2	3	10	5	14	17	4	23	6	16	1	3	2	2
OTU_53	Fungi	Ascomycota	Sordariomycetes	Incertae_sedis_7	Apiosporaceae	Arthrinium	Arthrinium_malaysianum|SH233379.06FU	1	1	3	2	10	20	15	13	5	3	0	12	0	0	1	0
OTU_54	Fungi	Ascomycota	Unclassified	Unclassified	Unclassified	Unclassified	Unclassified	3	4	4	3	13	2	3	21	3	23	1	12	0	4	4	1
OTU_55	Fungi	Basidiomycota	Ustilaginomycetes	Ustilaginales	Ustilaginaceae	Ustilaginaceae_unidentified	Ustilaginaceae_sp|SH241685.06FU	1	1	2	7	20	5	1	11	2	19	2	9	1	8	1	11
OTU_56	Fungi	Ascomycota	Dothideomycetes	Pleosporales	Phaeosphaeriaceae	Phaeosphaeriaceae_unidentified	Phaeosphaeriaceae_sp|SH206983.06FU	6	7	10	2	14	0	11	16	5	16	4	12	0	1	2	1
OTU_57	Fungi	Ascomycota	Sordariomycetes	Incertae_sedis_7	Magnaporthaceae	Pyricularia	Pyricularia_sp|SH230953.06FU	2	2	2	2	5	10	12	12	1	0	1	21	3	5	4	4
OTU_58	Fungi	Fungi_unidentified	Fungi_unidentified_1	Fungi_unidentified_1	Fungi_unidentified_1_1	Fungi_unidentified_1_1	Fungi_sp|SH212314.06FU	2	7	9	4	7	6	3	41	0	6	12	37	3	2	10	2
OTU_59	Fungi	Ascomycota	Ascomycota_unidentified	Ascomycota_unidentified_1	Ascomycota_unidentified_1	Ascomycota_unidentified_1_1	Ascomycota_sp|SH224125.06FU	5	2	3	3	10	7	3	29	1	20	1	16	0	4	1	1
OTU_60	Fungi	Ascomycota	Dothideomycetes	Capnodiales	Incertae_sedis_17	Toxicocladosporium	Toxicocladosporium_strelitziae|SH196751.06FU	5	0	12	6	17	8	9	4	3	9	1	2	2	1	2	1
OTU_61	Fungi	Ascomycota	Ascomycota_unidentified	Ascomycota_unidentified_1	Ascomycota_unidentified_1	Ascomycota_unidentified_1_1	Ascomycota_sp|SH191097.06FU	6	1	2	4	8	1	2	35	2	2	3	14	3	1	4	2
OTU_62	Fungi	Chytridiomycota	Chytridiomycetes	Spizellomycetales	Spizellomycetaceae	Powellomyces	Powellomyces_sp_EA|SH206807.06FU	0	0	0	0	0	0	0	0	0	0	0	0	0	0	0	69
OTU_63	Fungi	Ascomycota	Sordariomycetes	Hypocreales	Incertae_sedis_3	Myrothecium	Unclassified	2	2	2	0	3	1	1	3	33	2	1	1	4	7	1	11
OTU_64	Fungi	Ascomycota	Eurotiomycetes	Chaetothyriales	Chaetothyriaceae	Cyphellophora	Cyphellophora_pluriseptata|SH214503.06FU	1	4	48	0	6	1	2	1	1	3	0	1	0	0	2	0
OTU_65	Fungi	Ascomycota	Eurotiomycetes	Chaetothyriales	Chaetothyriales_unidentified	Chaetothyriales_unidentified_1	Unclassified	39	13	9	59	457	323	284	538	14	126	11	289	14	22	29	43
OTU_66	Fungi	Zygomycota	Incertae_sedis_10	Mucorales	Choanephoraceae	Choanephora	Choanephora_cucurbitarum|SH218423.06FU	3	6	1	6	1	3	8	14	6	5	3	3	0	0	2	1
OTU_67	Fungi	Ascomycota	Eurotiomycetes	Chaetothyriales	Chaetothyriales_unidentified	Chaetothyriales_unidentified_1	Chaetothyriales_sp|SH214498.06FU	6	2	2	9	12	5	5	2	1	6	6	6	0	2	1	1
OTU_68	Fungi	Ascomycota	Eurotiomycetes	Chaetothyriales	Chaetothyriaceae	Cyphellophora	Cyphellophora_suttonii|SH232792.06FU	0	0	2	1	3	4	2	42	12	1	15	8	4	3	15	4
OTU_69	Fungi	Basidiomycota	Ustilaginomycetes	Ustilaginales	Incertae_sedis_21	Farysizyma	Farysizyma_itapuensis|SH191069.06FU	4	0	0	1	26	25	0	0	0	4	0	4	1	0	0	0
OTU_70	Fungi	Ascomycota	Eurotiomycetes	Chaetothyriales	Incertae_sedis_42	Strelitziana	Strelitziana_albiziae|SH211993.06FU	0	6	3	2	17	6	11	19	1	4	1	11	2	4	4	2
OTU_71	Fungi	Basidiomycota	Agaricomycetes	Unclassified	Unclassified	Unclassified	Unclassified	6	4	5	5	15	6	5	7	2	5	1	1	0	0	1	0
OTU_72	Fungi	Ascomycota	Dothideomycetes	Incertae_sedis_8	Incertae_sedis_19	Leptospora	Leptospora_rubella|SH213116.06FU	2	1	4	1	9	5	5	5	2	15	3	8	4	1	1	2
OTU_73	Fungi	Ascomycota	Dothideomycetes	Capnodiales	Mycosphaerellaceae	Uwebraunia	Uwebraunia_musae|SH197937.06FU	13	6	5	7	8	15	5	15	1	13	1	10	6	6	2	2
OTU_74	Fungi	Ascomycota	Dothideomycetes	Incertae_sedis_8	Incertae_sedis_19	Leptospora	Leptospora_rubella|SH213116.06FU	2	6	5	2	8	0	5	3	4	10	2	5	0	0	0	0
OTU_75	Fungi	Ascomycota	Dothideomycetes	Pleosporales	Incertae_sedis_13	Stagonosporopsis	Stagonosporopsis_tanaceti|SH202147.06FU	5	1	3	7	10	0	3	24	6	4	5	6	0	2	2	2
OTU_76	Fungi	Ascomycota	Ascomycota_unidentified	Ascomycota_unidentified_1	Ascomycota_unidentified_1	Ascomycota_unidentified_1_1	Ascomycota_sp|SH211264.06FU	0	0	1	0	1	1	1	1	0	46	1	0	0	0	0	0
OTU_77	Fungi	Basidiomycota	Exobasidiomycetes	Exobasidiomycetes_unidentified	Exobasidiomycetes_unidentified_1	Exobasidiomycetes_unidentified_1	Exobasidiomycetes_sp|SH199847.06FU	11	8	5	0	5	1	1	5	0	3	0	3	18	26	8	3
OTU_78	Fungi	Ascomycota	Ascomycota_unidentified	Ascomycota_unidentified_1	Ascomycota_unidentified_1	Ascomycota_unidentified_1_1	Ascomycota_sp|SH224125.06FU	3	1	1	1	6	8	4	16	0	35	0	12	1	6	3	1
OTU_79	Fungi	Basidiomycota	Agaricomycetes	Agaricales	Marasmiaceae	Marasmius	Marasmius_maximus|SH219756.06FU	8	3	2	3	13	4	2	7	2	1	2	1	0	1	1	0
OTU_80	Fungi	Unclassified	Unclassified	Unclassified	Unclassified	Unclassified	Unclassified	3	4	2	2	1	2	3	5	1	9	1	7	0	2	4	0
OTU_81	Fungi	Basidiomycota	Microbotryomycetes	Sporidiobolales	Incertae_sedis_25	Sporobolomyces	Sporobolomyces_symmetricus|SH227541.06FU	1	0	1	5	2	0	2	3	1	8	1	12	1	0	0	2
OTU_82	Fungi	Ascomycota	Dothideomycetes	Pleosporales	Phaeosphaeriaceae	Sclerostagonospora	Sclerostagonospora_sp_CBS_118152|SH224099.06FU	12	6	2	2	36	14	10	3	3	4	0	7	2	0	0	1
OTU_83	Fungi	Basidiomycota	Agaricomycetes	Agaricales	Agaricales_unidentified	Agaricales_unidentified_1	Agaricales_sp|SH239391.06FU	5	6	10	2	7	8	5	4	4	6	2	6	0	0	0	0
OTU_84	Fungi	Ascomycota	Eurotiomycetes	Chaetothyriales	Chaetothyriaceae	Cyphellophora	Unclassified	1	1	5	3	31	0	3	1	0	4	1	1	1	2	0	0
OTU_85	Fungi	Basidiomycota	Ustilaginomycetes	Ustilaginales	Ustilaginaceae	Ustilago	Ustilago_longissima_var._macrospora|SH237194.06FU	0	0	1	1	4	0	0	1	5	1	8	8	0	1	0	0
OTU_86	Fungi	Ascomycota	Ascomycota_unidentified	Ascomycota_unidentified_1	Ascomycota_unidentified_1	Ascomycota_unidentified_1_1	Ascomycota_sp|SH205843.06FU	2	1	0	2	2	1	1	4	0	28	0	0	0	1	0	0
OTU_87	Fungi	Basidiomycota	Agaricomycetes	Auriculariales	Incertae_sedis_28	Auricularia	Auricularia_sp_12204|SH212879.06FU	12	1	1	1	4	6	6	1	1	2	1	0	0	0	0	0
OTU_88	Fungi	Ascomycota	Sordariomycetes	Incertae_sedis_7	Apiosporaceae	Arthrinium	Arthrinium_phragmites|SH233380.06FU	3	1	2	1	5	3	8	6	0	14	3	2	0	0	0	0
OTU_89	Fungi	Ascomycota	Incertae_sedis_14	Incertae_sedis_15	Incertae_sedis_16	Incertae_sedis_16_unidentified	Ascomycota_sp|SH226078.06FU	2	0	2	2	7	4	1	19	1	9	1	5	2	6	1	5
OTU_90	Fungi	Zygomycota	Incertae_sedis_10	Mucorales	Mucoraceae	Mucor	Mucor_circinelloides_f_lusitanicus|SH226012.06FU	5	1	1	1	9	4	15	2	1	1	0	2	0	0	0	0
OTU_91	Fungi	Basidiomycota	Agaricomycetes	Russulales	Peniophoraceae	Unclassified	Unclassified	3	4	2	3	6	3	0	0	6	0	0	3	1	1	1	0
OTU_92	Fungi	Ascomycota	Ascomycota_unidentified	Ascomycota_unidentified_1	Ascomycota_unidentified_1	Ascomycota_unidentified_1_1	Ascomycota_sp|SH240077.06FU	3	3	3	0	1	0	5	6	1	4	1	9	0	2	1	2
OTU_93	Fungi	Ascomycota	Dothideomycetes	Pleosporales	Leptosphaeriaceae	Coniothyrium	Coniothyrium_sp_JK27|SH233607.06FU	0	0	0	0	3	3	1	5	2	5	2	5	3	1	1	2
OTU_94	Fungi	Fungi_unidentified	Fungi_unidentified_1	Fungi_unidentified_1	Fungi_unidentified_1_1	Fungi_unidentified_1_1	Fungi_sp|SH213113.06FU	5	5	1	2	5	1	2	8	5	3	0	3	0	1	0	0
OTU_95	Fungi	Ascomycota	Eurotiomycetes	Chaetothyriales	Incertae_sedis_42	Strelitziana	Strelitziana_albiziae|SH211993.06FU	5	1	3	4	16	8	14	19	2	11	1	10	2	4	0	1
OTU_96	Fungi	Ascomycota	Sordariomycetes	Diaporthales	Diaporthaceae	Diaporthe	Diaporthe_caulivora|SH194728.06FU	2	3	0	4	14	1	2	3	2	7	1	4	1	2	0	1
OTU_97	Fungi	Fungi_unidentified	Fungi_unidentified_1	Fungi_unidentified_1	Fungi_unidentified_1_1	Fungi_unidentified_1_1	Fungi_sp|SH192549.06FU	6	0	1	1	6	2	2	2	4	6	1	5	2	2	0	1
OTU_98	Fungi	Ascomycota	Dothideomycetes	Capnodiales	Mycosphaerellaceae	Dissoconium	Dissoconium_proteae|SH197939.06FU	2	1	1	1	1	1	0	2	0	2	0	5	5	4	3	3
OTU_99	Fungi	Ascomycota	Eurotiomycetes	Chaetothyriales	Chaetothyriaceae	Cyphellophora	Cyphellophora_suttonii|SH232792.06FU	0	0	1	2	3	5	2	5	0	6	0	4	1	3	1	0
OTU_100	Fungi	Ascomycota	Ascomycota_unidentified	Ascomycota_unidentified_1	Ascomycota_unidentified_1	Ascomycota_unidentified_1_1	Unclassified	4	2	4	2	7	4	4	11	4	6	1	10	5	1	4	3
OTU_101	Fungi	Basidiomycota	Microbotryomycetes	Leucosporidiales	Leucosporidiaceae	Leucosporidiella	Leucosporidiella_fragaria|SH212317.06FU	2	2	2	2	1	1	0	12	2	4	4	11	1	3	1	0
OTU_102	Fungi	Basidiomycota	Agaricomycetes	Agaricales	Psathyrellaceae	Psathyrella	Psathyrella_candolleana|SH199666.06FU	5	2	5	2	6	1	1	2	0	6	2	2	0	0	0	0
OTU_103	Fungi	Ascomycota	Dothideomycetes	Pleosporales	Phaeosphaeriaceae	Phaeosphaeria	Phaeosphaeria_fuckelii|SH240851.06FU	3	1	1	0	3	2	1	2	0	2	1	2	0	0	1	1
OTU_104	Fungi	Ascomycota	Dothideomycetes	Capnodiales	Mycosphaerellaceae	Cercospora	Cercospora_apii|SH212704.06FU	0	0	0	1	5	4	21	0	0	0	1	4	1	1	1	1
OTU_105	Fungi	Ascomycota	Eurotiomycetes	Chaetothyriales	Chaetothyriales_unidentified	Chaetothyriales_unidentified_1	Chaetothyriales_sp|SH201524.06FU	2	0	0	0	8	4	8	7	0	7	0	5	0	0	0	1
OTU_106	Fungi	Ascomycota	Dothideomycetes	Botryosphaeriales	Botryosphaeriaceae	Botryosphaeria	Botryosphaeria_corticis|SH206853.06FU	6	2	1	0	4	3	3	2	1	5	2	1	0	1	0	0
OTU_107	Fungi	Ascomycota	Unclassified	Unclassified	Unclassified	Unclassified	Unclassified	1	2	1	1	4	6	2	11	1	4	2	7	0	0	0	1
OTU_108	Fungi	Ascomycota	Sordariomycetes	Hypocreales	Cordycipitaceae	Lecanicillium	Lecanicillium_longisporum|SH196289.06FU	1	0	1	0	0	0	0	3	1	14	0	0	0	0	0	0
OTU_109	Fungi	Ascomycota	Eurotiomycetes	Chaetothyriales	Chaetothyriales_unidentified	Chaetothyriales_unidentified_1	Unclassified	0	0	2	1	5	4	11	16	1	4	0	44	0	0	0	0
OTU_110	Fungi	Basidiomycota	Unclassified	Unclassified	Unclassified	Unclassified	Unclassified	0	0	0	0	0	0	0	49	1	0	2	0	0	0	1	0
OTU_111	Fungi	Ascomycota	Eurotiomycetes	Eurotiales	Trichocomaceae	Aspergillus	Aspergillus_ibericus|SH205279.06FU	0	1	0	0	2	0	0	3	0	0	5	4	5	0	1	0
OTU_112	Fungi	Basidiomycota	Agaricomycetes	Polyporales	Meripilaceae	Rigidoporus	Unclassified	7	1	2	3	10	3	2	1	0	0	2	1	1	3	1	1
OTU_113	Fungi	Basidiomycota	Agaricomycetes	Agaricomycetes_unidentified	Agaricomycetes_unidentified_1	Agaricomycetes_unidentified_1	Agaricomycetes_sp|SH234602.06FU	11	8	13	8	14	8	4	1	6	4	2	5	2	1	1	2
OTU_114	Fungi	Ascomycota	Dothideomycetes	Pleosporales	Pleosporales_unidentified	Pleosporales_unidentified_1	Pleosporales_sp|SH232018.06FU	2	1	2	0	0	3	0	2	0	3	1	2	0	0	1	1
OTU_115	Fungi	Basidiomycota	Microbotryomycetes	Microbotryales	Ustilentylomataceae	Microbotryozyma	Microbotryozyma_collariae|SH238724.06FU	0	1	1	2	1	1	2	2	0	1	2	12	0	0	0	0
OTU_116	Fungi	Ascomycota	Dothideomycetes	Dothideomycetes_unidentified	Dothideomycetes_unidentified_1	Dothideomycetes_unidentified_1	Dothideomycetes_sp|SH225319.06FU	2	0	0	1	0	3	1	9	0	2	1	6	1	2	0	0
OTU_117	Fungi	Ascomycota	Sordariomycetes	Unclassified	Unclassified	Unclassified	Unclassified	1	0	4	0	2	1	0	3	0	1	1	2	0	0	1	1
OTU_118	Fungi	Ascomycota	Eurotiomycetes	Eurotiales	Trichocomaceae	Penicillium	Penicillium_brocae|SH213199.06FU	0	0	0	18	1	0	0	1	0	0	0	0	0	0	0	1
OTU_119	Fungi	Ascomycota	Dothideomycetes	Pleosporales	Lophiostomataceae	Lophiostoma	Lophiostoma_sp|SH235594.06FU	5	2	0	0	5	0	1	4	1	1	1	1	2	1	0	1
OTU_120	Fungi	Ascomycota	Dothideomycetes	Pleosporales	Leptosphaeriaceae	Coniothyrium	Coniothyrium_sidae|SH196237.06FU	1	1	0	2	4	2	8	1	1	5	3	2	0	0	0	0
OTU_121	Fungi	Ascomycota	Ascomycota_unidentified	Ascomycota_unidentified_1	Ascomycota_unidentified_1	Ascomycota_unidentified_1_1	Unclassified	1	0	2	1	2	2	4	3	0	1	1	0	0	2	1	1
OTU_122	Fungi	Ascomycota	Sordariomycetes	Diaporthales	Diaporthaceae	Diaporthe	Diaporthe_alleghaniensis|SH214040.06FU	1	1	3	0	5	5	1	2	1	2	0	6	1	2	1	1
OTU_123	Fungi	Ascomycota	Sordariomycetes	Hypocreales	Incertae_sedis_3	Sarocladium	Sarocladium_strictum|SH191575.06FU	2	1	2	2	0	0	1	2	0	3	0	0	0	4	0	1
OTU_124	Fungi	Ascomycota	Sordariomycetes	Xylariales	Diatrypaceae	Diatrypaceae_unidentified	Diatrypaceae_sp|SH227086.06FU	3	0	2	1	4	0	0	1	2	5	1	0	1	0	0	1
OTU_125	Fungi	Ascomycota	Sordariomycetes	Xylariales	Diatrypaceae	Diatrypaceae_unidentified	Diatrypaceae_sp|SH227086.06FU	4	9	0	0	6	0	0	7	2	2	1	1	0	0	0	0
OTU_126	Fungi	Ascomycota	Dothideomycetes	Pleosporales	Pleosporaceae	Pleosporaceae_unidentified	Pleosporaceae_sp|SH230451.06FU	2	2	1	1	0	0	0	1	1	4	0	3	0	0	0	0
OTU_127	Fungi	Ascomycota	Dothideomycetes	Pleosporales	Unclassified	Unclassified	Unclassified	1	0	1	0	3	2	2	2	1	2	0	2	0	0	0	0
OTU_128	Fungi	Fungi_unidentified	Fungi_unidentified_1	Fungi_unidentified_1	Fungi_unidentified_1_1	Fungi_unidentified_1_1	Fungi_sp|SH201526.06FU	1	0	1	0	1	3	9	9	0	2	0	3	0	1	0	0
OTU_129	Fungi	Ascomycota	Sordariomycetes	Sordariomycetes_unidentified	Sordariomycetes_unidentified_1	Sordariomycetes_unidentified_1	Sordariomycetes_sp|SH212488.06FU	3	3	1	3	7	2	3	5	2	13	3	4	1	3	0	0
OTU_130	Fungi	Ascomycota	Dothideomycetes	Pleosporales	Incertae_sedis_13	Pyrenochaeta	Pyrenochaeta_lycopersici|SH240064.06FU	0	2	0	0	0	0	0	0	0	1	0	0	1	11	0	2
OTU_131	Fungi	Ascomycota	Dothideomycetes	Capnodiales	Incertae_sedis_17	Toxicocladosporium	Toxicocladosporium_strelitziae|SH196751.06FU	1	0	0	1	3	1	5	4	0	1	0	2	1	0	1	0
OTU_132	Fungi	Ascomycota	Sordariomycetes	Hypocreales	Hypocreales_unidentified	Hypocreales_unidentified_1	Hypocreales_sp|SH196295.06FU	0	0	0	0	0	0	0	0	0	15	1	0	0	0	0	0
OTU_133	Fungi	Basidiomycota	Agaricomycetes	Agaricales	Agaricales_unidentified	Agaricales_unidentified_1	Agaricales_sp|SH231434.06FU	1	1	2	1	3	1	2	2	0	1	0	4	0	0	0	1
OTU_134	Fungi	Ascomycota	Sordariomycetes	Sordariales	Sordariaceae	Sordariaceae_unidentified	Sordariaceae_sp|SH213056.06FU	2	0	9	1	0	0	0	4	0	3	2	2	0	1	1	0
OTU_135	Fungi	Basidiomycota	Tremellomycetes	Tremellales	Incertae_sedis_12	Hannaella	Hannaella_sp_CMON52|SH197181.06FU	0	6	3	5	1	2	0	1	1	0	1	1	0	0	0	0
OTU_136	Fungi	Ascomycota	Unclassified	Unclassified	Unclassified	Unclassified	Unclassified	1	0	3	1	2	0	3	3	0	3	0	3	0	1	0	1
OTU_137	Fungi	Basidiomycota	Agaricomycetes	Agaricales	Psathyrellaceae	Psathyrella	Psathyrella_candolleana|SH199666.06FU	0	4	5	4	9	1	2	0	6	5	1	4	0	3	0	0
OTU_138	Fungi	Ascomycota	Dothideomycetes	Capnodiales	Mycosphaerellaceae	Unclassified	Unclassified	2	7	5	2	4	8	1	6	1	9	0	9	2	3	0	1
OTU_139	Fungi	Basidiomycota	Microbotryomycetes	Sporidiobolales	Incertae_sedis_25	Rhodotorula	Rhodotorula_acheniorum|SH191070.06FU	0	0	0	0	0	2	0	2	1	3	0	6	0	0	0	1
OTU_140	Fungi	Unclassified	Unclassified	Unclassified	Unclassified	Unclassified	Unclassified	4	1	5	0	2	0	2	0	0	0	0	0	0	0	0	0
OTU_141	Fungi	Ascomycota	Dothideomycetes	Pleosporales	Incertae_sedis_13	Leptosphaerulina	Leptosphaerulina_chartarum|SH227423.06FU	0	0	0	1	6	5	0	2	0	0	1	0	0	0	0	0
OTU_142	Fungi	Ascomycota	Eurotiomycetes	Chaetothyriales	Chaetothyriales_unidentified	Chaetothyriales_unidentified_1	Chaetothyriales_sp|SH201524.06FU	0	0	0	0	1	1	7	0	0	2	0	6	0	0	0	0
OTU_143	Fungi	Unclassified	Unclassified	Unclassified	Unclassified	Unclassified	Unclassified	99	131	133	94	97	77	452	89	162	168	133	119	26	51	28	53
OTU_144	Fungi	Ascomycota	Sordariomycetes	Xylariales	Xylariaceae	Whalleya	Whalleya_microplaca|SH227044.06FU	1	2	0	1	2	0	0	1	0	3	2	3	0	0	0	0
OTU_145	Fungi	Ascomycota	Eurotiomycetes	Chaetothyriales	Unclassified	Unclassified	Unclassified	0	1	1	3	6	1	2	5	2	2	0	3	2	0	0	2
OTU_146	Fungi	Ascomycota	Dothideomycetes	Capnodiales	Mycosphaerellaceae	Uwebraunia	Uwebraunia_musae|SH197937.06FU	3	2	1	4	4	9	2	2	0	7	0	3	1	7	1	1
OTU_147	Fungi	Ascomycota	Dothideomycetes	Pleosporales	Incertae_sedis_13	Phoma	Phoma_brasiliensis|SH202145.06FU	1	2	1	1	5	2	19	0	1	2	0	3	0	0	0	1
OTU_148	Fungi	Ascomycota	Dothideomycetes	Pleosporales	Leptosphaeriaceae	Leptosphaeriaceae_unidentified	Leptosphaeriaceae_sp|SH206994.06FU	3	2	0	3	4	0	2	1	0	4	1	2	2	0	1	0
OTU_149	Fungi	Basidiomycota	Agaricomycetes	Agaricomycetes_unidentified	Agaricomycetes_unidentified_1	Agaricomycetes_unidentified_1	Agaricomycetes_sp|SH214757.06FU	1	3	2	1	2	0	0	2	0	0	0	0	0	0	0	0
OTU_150	Fungi	Ascomycota	Dothideomycetes	Pleosporales	Incertae_sedis_13	Phoma	Phoma_brasiliensis|SH202145.06FU	2	0	4	3	2	0	5	7	2	1	1	4	0	0	1	1
OTU_151	Fungi	Basidiomycota	Agaricomycetes	Agaricales	Unclassified	Unclassified	Unclassified	5	1	3	2	2	0	1	3	0	2	0	1	0	0	0	0
OTU_152	Fungi	Ascomycota	Sordariomycetes	Diaporthales	Diaporthaceae	Diaporthe	Diaporthe_phaseolorum|SH194772.06FU	1	1	0	0	3	0	0	1	2	3	0	1	0	0	0	0
OTU_153	Fungi	Ascomycota	Dothideomycetes	Capnodiales	Mycosphaerellaceae	Unclassified	Unclassified	1	1	1	0	6	1	16	0	0	3	0	1	2	2	0	2
OTU_154	Fungi	Ascomycota	Dothideomycetes	Capnodiales	Incertae_sedis_17	Toxicocladosporium	Toxicocladosporium_strelitziae|SH196751.06FU	0	0	0	1	4	2	0	0	1	1	0	0	0	0	0	0
OTU_155	Fungi	Ascomycota	Pezizomycetes	Pezizomycetes_unidentified	Pezizomycetes_unidentified_1	Pezizomycetes_unidentified_1	Pezizomycetes_sp|SH212017.06FU	0	3	3	2	3	0	1	1	0	2	0	0	0	0	0	0
OTU_156	Fungi	Ascomycota	Dothideomycetes	Capnodiales	Davidiellaceae	Davidiella	Davidiella_tassiana|SH196750.06FU	1	0	1	1	1	1	1	1	0	3	1	10	2	1	1	0
OTU_157	Fungi	Ascomycota	Ascomycota_unidentified	Ascomycota_unidentified_1	Ascomycota_unidentified_1	Ascomycota_unidentified_1_1	Ascomycota_sp|SH213531.06FU	2	2	1	0	3	1	0	2	0	3	1	2	0	2	0	1
OTU_158	Fungi	Ascomycota	Dothideomycetes	Pleosporales	Montagnulaceae	Montagnulaceae_unidentified	Montagnulaceae_sp|SH189962.06FU	1	1	1	1	0	1	0	6	2	1	0	5	0	0	0	0
OTU_159	Fungi	Basidiomycota	Agaricomycetes	Hymenochaetales	Schizoporaceae	Schizopora	Schizopora_ovispora|SH204974.06FU	3	2	5	2	1	0	0	0	0	1	0	0	0	0	0	1
OTU_160	Fungi	Ascomycota	Sordariomycetes	Diaporthales	Incertae_sedis_20	Ophiognomonia	Ophiognomonia_sogonovii|SH226094.06FU	1	0	0	3	3	1	3	8	0	1	0	4	0	0	0	0
OTU_161	Fungi	Basidiomycota	Tremellomycetes	Tremellomycetes_unidentified	Tremellomycetes_unidentified_1	Tremellomycetes_unidentified_1	Tremellomycetes_sp|SH212072.06FU	7	0	0	0	0	0	54	0	0	1	0	0	0	0	0	3
OTU_162	Fungi	Ascomycota	Ascomycota_unidentified	Ascomycota_unidentified_1	Ascomycota_unidentified_1	Ascomycota_unidentified_1_1	Ascomycota_sp|SH224125.06FU	0	0	0	0	1	1	1	2	1	3	0	0	0	1	0	0
OTU_163	Fungi	Ascomycota	Eurotiomycetes	Chaetothyriales	Unclassified	Unclassified	Unclassified	0	0	2	0	2	0	1	1	0	1	0	0	0	0	1	0
OTU_164	Fungi	Ascomycota	Eurotiomycetes	Chaetothyriales	Chaetothyriales_unidentified	Chaetothyriales_unidentified_1	Unclassified	4	9	5	2	19	13	13	33	2	11	2	16	1	9	4	8
OTU_165	Fungi	Ascomycota	Dothideomycetes	Pleosporales	Pleosporales_unidentified	Pleosporales_unidentified_1	Unclassified	0	0	0	1	3	0	0	0	1	1	1	1	0	0	0	0
OTU_166	Fungi	Ascomycota	Dothideomycetes	Pleosporales	Pleosporaceae	Pleospora	Pleospora_herbarum|SH224791.06FU	0	0	1	0	0	0	0	0	0	6	0	0	0	0	1	0
OTU_167	Fungi	Ascomycota	Dothideomycetes	Pleosporales	Incertae_sedis_13	Ascochyta	Unclassified	1	0	2	1	3	0	1	0	1	0	0	1	0	1	0	0
OTU_168	Fungi	Basidiomycota	Agaricomycetes	Polyporales	Polyporales_unidentified	Polyporales_unidentified_1	Polyporales_sp|SH214762.06FU	0	0	1	0	1	1	1	0	0	2	1	2	0	0	0	0
OTU_169	Fungi	Ascomycota	Dothideomycetes	Capnodiales	Incertae_sedis_17	Toxicocladosporium	Toxicocladosporium_strelitziae|SH196751.06FU	3	2	0	0	0	3	2	1	0	2	0	2	0	1	0	1
OTU_170	Fungi	Ascomycota	Dothideomycetes	Capnodiales	Teratosphaeriaceae	Devriesia	Devriesia_fraseriae|SH189975.06FU	2	4	2	0	7	3	2	2	4	3	3	1	0	0	0	1
OTU_171	Fungi	Ascomycota	Sordariomycetes	Hypocreales	Hypocreaceae	Trichoderma	Trichoderma_viride|SH222750.06FU	3	1	1	1	1	0	3	0	0	1	0	2	2	0	4	2
OTU_172	Fungi	Ascomycota	Dothideomycetes	Incertae_sedis_8	Incertae_sedis_19	Leptospora	Leptospora_rubella|SH213116.06FU	0	2	1	0	0	0	2	2	0	1	1	1	0	0	0	1
OTU_173	Fungi	Unclassified	Unclassified	Unclassified	Unclassified	Unclassified	Unclassified	1	0	0	1	8	1	1	0	1	1	0	0	0	0	0	0
OTU_174	Fungi	Ascomycota	Dothideomycetes	Capnodiales	Incertae_sedis_17	Rachicladosporium	Rachicladosporium_americanum|SH235213.06FU	3	0	0	1	4	0	0	2	0	2	0	3	2	0	0	1
OTU_175	Fungi	Ascomycota	Dothideomycetes	Dothideomycetes_unidentified	Dothideomycetes_unidentified_1	Dothideomycetes_unidentified_1	Dothideomycetes_sp|SH227297.06FU	4	0	3	0	4	0	1	2	1	3	1	1	0	0	0	1
OTU_176	Fungi	Unclassified	Unclassified	Unclassified	Unclassified	Unclassified	Unclassified	0	1	0	1	0	0	0	3	0	0	0	1	0	0	0	0
OTU_177	Fungi	Basidiomycota	Agaricomycetes	Agaricomycetes_unidentified	Agaricomycetes_unidentified_1	Agaricomycetes_unidentified_1	Agaricomycetes_sp|SH210627.06FU	1	1	2	0	1	0	0	0	1	0	1	0	0	0	0	0
OTU_178	Fungi	Basidiomycota	Unclassified	Unclassified	Unclassified	Unclassified	Unclassified	0	0	0	0	1	6	0	0	0	0	0	4	0	0	0	0
OTU_179	Fungi	Basidiomycota	Agaricomycetes	Agaricales	Strophariaceae	Gymnopilus	Gymnopilus_dilepis|SH199459.06FU	2	2	1	0	2	0	2	1	0	0	0	0	0	0	0	0
OTU_180	Fungi	Ascomycota	Eurotiomycetes	Eurotiales	Trichocomaceae	Penicillium	Penicillium_citrinum|SH213185.06FU	1	0	0	1	0	0	0	2	0	1	0	0	0	1	0	0
OTU_181	Fungi	Ascomycota	Dothideomycetes	Capnodiales	Incertae_sedis_17	Toxicocladosporium	Toxicocladosporium_strelitziae|SH196751.06FU	1	0	1	1	0	1	0	0	0	0	1	0	0	1	0	1
OTU_182	Fungi	Basidiomycota	Microbotryomycetes	Sporidiobolales	Sporidiobolales_unidentified	Sporidiobolales_unidentified_1	Sporidiobolales_sp|SH196708.06FU	3	1	3	0	1	1	1	0	2	2	0	3	0	2	1	0
OTU_183	Fungi	Ascomycota	Unclassified	Unclassified	Unclassified	Unclassified	Unclassified	0	0	0	1	1	0	1	1	0	0	0	2	0	0	0	0
OTU_184	Fungi	Basidiomycota	Agaricomycetes	Agaricales	Marasmiaceae	Marasmius	Marasmius_crescentiae|SH190186.06FU	4	1	3	1	6	1	1	1	0	1	0	1	0	0	0	0
OTU_185	Fungi	Fungi_unidentified	Fungi_unidentified_1	Fungi_unidentified_1	Fungi_unidentified_1_1	Fungi_unidentified_1_1	Fungi_sp|SH201526.06FU	0	0	0	0	0	0	0	8	0	0	0	0	0	0	0	0
OTU_186	Fungi	Ascomycota	Eurotiomycetes	Chaetothyriales	Chaetothyriaceae	Cyphellophora	Cyphellophora_sp_CBS_11294|SH232793.06FU	0	0	0	1	0	0	0	4	1	1	1	0	0	2	0	0
OTU_187	Fungi	Basidiomycota	Agaricomycetes	Hymenochaetales	Schizoporaceae	Xylodon	Unclassified	1	2	2	0	3	0	1	0	2	1	0	0	0	0	0	0
OTU_188	Fungi	Ascomycota	Dothideomycetes	Pleosporales	Pleosporaceae	Cochliobolus	Cochliobolus_cynodontis|SH197546.06FU	0	1	1	0	1	0	0	1	0	0	0	1	1	1	0	0
OTU_189	Fungi	Ascomycota	Dothideomycetes	Pleosporales	Pleosporales_unidentified	Pleosporales_unidentified_1	Pleosporales_sp|SH205840.06FU	0	1	0	0	0	1	0	1	0	2	0	0	0	0	0	0
OTU_190	Fungi	Ascomycota	Dothideomycetes	Capnodiales	Mycosphaerellaceae	Mycosphaerella	Mycosphaerella_gregaria|SH235741.06FU	1	0	0	0	1	1	1	2	1	7	0	0	0	1	0	0
OTU_191	Fungi	Ascomycota	Dothideomycetes	Pleosporales	Pleosporales_unidentified	Pleosporales_unidentified_1	Pleosporales_sp|SH196178.06FU	0	0	0	1	1	1	0	2	1	3	0	3	0	0	0	0
OTU_192	Fungi	Ascomycota	Unclassified	Unclassified	Unclassified	Unclassified	Unclassified	0	0	0	0	1	0	0	2	1	0	0	1	0	0	0	0
OTU_193	Fungi	Ascomycota	Sordariomycetes	Xylariales	Diatrypaceae	Libertella	Libertella_sp_EXP0557F|SH241107.06FU	1	0	0	0	1	1	0	1	2	0	1	1	0	0	0	0
OTU_194	Fungi	Ascomycota	Ascomycota_unidentified	Ascomycota_unidentified_1	Ascomycota_unidentified_1	Ascomycota_unidentified_1_1	Ascomycota_sp|SH189849.06FU	0	0	3	0	4	0	0	0	0	0	0	0	0	0	0	0
OTU_195	Fungi	Ascomycota	Unclassified	Unclassified	Unclassified	Unclassified	Unclassified	0	0	0	0	0	0	0	9	0	0	0	0	0	0	0	0
OTU_196	Fungi	Ascomycota	Dothideomycetes	Pleosporales	Pleosporales_unidentified	Pleosporales_unidentified_1	Pleosporales_sp|SH231086.06FU	0	0	0	0	0	0	0	1	2	1	0	1	0	1	0	0
OTU_197	Fungi	Basidiomycota	Agaricomycetes	Agaricomycetes_unidentified	Agaricomycetes_unidentified_1	Agaricomycetes_unidentified_1	Agaricomycetes_sp|SH239394.06FU	3	1	1	2	2	0	0	2	1	1	0	1	0	0	0	1
OTU_198	Fungi	Ascomycota	Dothideomycetes	Pleosporales	Pleosporales_unidentified	Pleosporales_unidentified_1	Unclassified	0	0	0	0	3	1	0	0	0	0	0	1	0	0	1	1
OTU_199	Fungi	Ascomycota	Sordariomycetes	Sordariomycetes_unidentified	Sordariomycetes_unidentified_1	Sordariomycetes_unidentified_1	Sordariomycetes_sp|SH219629.06FU	3	1	0	0	6	3	7	1	1	0	1	2	2	0	0	1
OTU_200	Fungi	Ascomycota	Eurotiomycetes	Chaetothyriales	Chaetothyriales_unidentified	Chaetothyriales_unidentified_1	Chaetothyriales_sp|SH201524.06FU	2	0	0	0	1	0	0	3	0	1	1	1	0	0	0	0
OTU_201	Fungi	Ascomycota	Dothideomycetes	Capnodiales	Mycosphaerellaceae	Unclassified	Unclassified	1	0	0	0	1	0	2	1	0	2	1	2	0	0	1	1
OTU_202	Fungi	Ascomycota	Dothideomycetes	Pleosporales	Pleosporaceae	Pleosporaceae_unidentified	Pleosporaceae_sp|SH224807.06FU	2	0	1	0	0	1	0	0	0	2	1	0	0	0	0	0
OTU_203	Fungi	Ascomycota	Sordariomycetes	Incertae_sedis_7	Glomerellaceae	Colletotrichum	Colletotrichum_proteae|SH220296.06FU	0	0	0	2	0	0	0	5	0	1	1	1	0	0	0	0
OTU_204	Fungi	Ascomycota	Sordariomycetes	Sordariomycetes_unidentified	Sordariomycetes_unidentified_1	Sordariomycetes_unidentified_1	Sordariomycetes_sp|SH211313.06FU	0	0	0	1	1	0	0	1	0	1	0	0	0	0	0	0
OTU_205	Fungi	Ascomycota	Ascomycota_unidentified	Ascomycota_unidentified_1	Ascomycota_unidentified_1	Ascomycota_unidentified_1_1	Ascomycota_sp|SH212031.06FU	0	0	0	0	0	0	0	0	0	1	0	1	1	1	0	0
OTU_206	Fungi	Ascomycota	Sordariomycetes	Diaporthales	Diaporthaceae	Diaporthe	Diaporthe_lithicola|SH194727.06FU	2	0	0	2	9	0	3	0	1	1	0	1	1	0	0	1
OTU_207	Fungi	Ascomycota	Dothideomycetes	Capnodiales	Mycosphaerellaceae	Pseudocercospora	Pseudocercospora_dovyalidis|SH212656.06FU	0	0	0	0	2	2	13	1	1	0	0	0	1	0	0	1
OTU_208	Fungi	Ascomycota	Dothideomycetes	Pleosporales	Unclassified	Unclassified	Unclassified	4	4	3	0	3	0	3	2	0	4	1	2	1	0	0	1
OTU_209	Fungi	Ascomycota	Sordariomycetes	Incertae_sedis_7	Glomerellaceae	Colletotrichum	Colletotrichum_petchii|SH233479.06FU	0	0	0	1	0	0	0	1	0	0	1	0	0	0	1	0
OTU_210	Fungi	Basidiomycota	Exobasidiomycetes	Exobasidiomycetes_unidentified	Exobasidiomycetes_unidentified_1	Exobasidiomycetes_unidentified_1	Exobasidiomycetes_sp|SH230060.06FU	0	0	0	0	0	3	0	1	0	0	0	0	0	1	0	0
OTU_211	Fungi	Basidiomycota	Microbotryomycetes	Sporidiobolales	Incertae_sedis_25	Sporobolomyces	Unclassified	1	2	1	0	1	0	0	2	0	0	0	1	0	1	1	0
OTU_212	Fungi	Unclassified	Unclassified	Unclassified	Unclassified	Unclassified	Unclassified	2	1	1	9	38	17	11	19	1	11	2	6	0	1	0	4
OTU_213	Fungi	Ascomycota	Taphrinomycetes	Taphrinales	Taphrinaceae	Taphrina	Taphrina_americana|SH211018.06FU	1	2	0	0	1	0	2	0	0	1	1	1	0	0	0	0
OTU_214	Fungi	Ascomycota	Dothideomycetes	Dothideomycetes_unidentified	Dothideomycetes_unidentified_1	Dothideomycetes_unidentified_1	Unclassified	0	0	0	0	2	0	0	1	0	0	0	1	0	0	0	0
OTU_215	Fungi	Ascomycota	Ascomycota_unidentified	Ascomycota_unidentified_1	Ascomycota_unidentified_1	Ascomycota_unidentified_1_1	Ascomycota_sp|SH235462.06FU	2	1	0	0	1	1	0	0	0	0	0	0	0	0	0	0
OTU_216	Fungi	Basidiomycota	Agaricomycetes	Russulales	Russulales_unidentified	Russulales_unidentified_1	Russulales_sp|SH234592.06FU	2	0	0	0	3	1	0	0	1	1	0	2	0	0	0	0
OTU_217	Fungi	Ascomycota	Dothideomycetes	Pleosporales	Cucurbitariaceae	Curreya	Curreya_sp|SH206676.06FU	0	0	0	0	1	0	1	0	0	4	0	0	0	0	0	0
OTU_218	Fungi	Ascomycota	Dothideomycetes	Dothideales	Dothioraceae	Aureobasidium	Aureobasidium_sp|SH229246.06FU	0	0	0	1	2	0	0	1	0	0	0	1	0	0	0	1
OTU_219	Fungi	Basidiomycota	Agaricomycetes	Agaricales	Psathyrellaceae	Psathyrella	Psathyrella_candolleana|SH199666.06FU	1	2	3	2	2	2	1	3	2	0	0	5	0	0	1	1
OTU_220	Fungi	Ascomycota	Eurotiomycetes	Chaetothyriales	Herpotrichiellaceae	Exophiala	Exophiala_equina|SH230191.06FU	0	2	0	0	0	0	4	0	0	0	0	0	0	0	0	0
OTU_221	Fungi	Ascomycota	Dothideomycetes	Pleosporales	Pleosporaceae	Alternaria	Alternaria_brassicae|SH230452.06FU	1	0	0	0	3	0	0	1	0	0	0	0	0	0	0	0
OTU_222	Fungi	Ascomycota	Eurotiomycetes	Chaetothyriales	Chaetothyriales_unidentified	Chaetothyriales_unidentified_1	Chaetothyriales_sp|SH214498.06FU	0	0	1	0	0	0	0	0	0	1	0	1	0	0	0	1
OTU_223	Fungi	Unclassified	Unclassified	Unclassified	Unclassified	Unclassified	Unclassified	1	0	1	0	2	0	0	0	0	1	0	1	0	0	0	0
OTU_224	Fungi	Ascomycota	Dothideomycetes	Pleosporales	Incertae_sedis_13	Botryosporium	Botryosporium_longibrachiatum|SH226074.06FU	0	0	3	0	1	0	2	0	0	1	0	0	0	0	0	0
OTU_225	Fungi	Ascomycota	Dothideomycetes	Myriangiales	Elsinoaceae	Elsinoe	Elsinoe_australis|SH210160.06FU	3	0	0	1	0	0	1	0	0	1	0	1	0	1	0	0
OTU_226	Fungi	Ascomycota	Ascomycota_unidentified	Ascomycota_unidentified_1	Ascomycota_unidentified_1	Ascomycota_unidentified_1_1	Ascomycota_sp|SH189849.06FU	0	0	0	0	0	0	0	1	1	1	0	1	0	2	0	0
OTU_227	Fungi	Unclassified	Unclassified	Unclassified	Unclassified	Unclassified	Unclassified	0	0	0	0	1	0	1	1	1	1	0	3	0	0	0	0
OTU_228	Fungi	Ascomycota	Eurotiomycetes	Eurotiales	Trichocomaceae	Aspergillus	Aspergillus_fumigatus|SH199400.06FU	0	0	0	0	0	0	1	1	0	0	1	0	0	1	1	0
OTU_229	Fungi	Ascomycota	Eurotiomycetes	Chaetothyriales	Herpotrichiellaceae	Phaeococcomyces	Phaeococcomyces_sp|SH217607.06FU	0	0	1	0	0	0	0	0	0	2	0	3	0	0	0	0
OTU_230	Fungi	Ascomycota	Ascomycota_unidentified	Ascomycota_unidentified_1	Ascomycota_unidentified_1	Ascomycota_unidentified_1_1	Ascomycota_sp|SH193627.06FU	0	0	2	0	1	0	1	0	0	1	0	0	0	0	0	0
OTU_231	Fungi	Ascomycota	Eurotiomycetes	Chaetothyriales	Chaetothyriales_unidentified	Chaetothyriales_unidentified_1	Chaetothyriales_sp|SH190370.06FU	0	0	0	0	1	0	0	3	0	0	0	0	0	0	0	0
OTU_232	Fungi	Ascomycota	Dothideomycetes	Capnodiales	Mycosphaerellaceae	Dissoconium	Dissoconium_proteae|SH197939.06FU	1	1	0	0	0	0	0	1	0	0	0	0	0	2	0	0
OTU_233	Fungi	Ascomycota	Ascomycota_unidentified	Ascomycota_unidentified_1	Ascomycota_unidentified_1	Ascomycota_unidentified_1_1	Ascomycota_sp|SH205837.06FU	0	0	0	1	1	0	0	3	1	2	0	0	0	1	0	0
OTU_234	Fungi	Ascomycota	Sordariomycetes	Diaporthales	Diaporthaceae	Diaporthaceae_unidentified	Diaporthaceae_sp|SH194752.06FU	4	1	1	0	17	2	5	2	0	0	0	2	0	0	1	1
OTU_235	Fungi	Ascomycota	Eurotiomycetes	Eurotiales	Trichocomaceae	Penicillium	Penicillium_spinulosum|SH231533.06FU	0	0	1	0	4	0	0	1	0	0	0	1	0	0	0	0
OTU_236	Fungi	Ascomycota	Eurotiomycetes	Eurotiales	Trichocomaceae	Trichocomaceae_unidentified	Trichocomaceae_sp|SH201032.06FU	2	0	1	0	3	0	0	0	0	0	0	2	0	0	0	0
OTU_237	Fungi	Ascomycota	Dothideomycetes	Pleosporales	Incertae_sedis_13	Phoma	Phoma_brasiliensis|SH202145.06FU	0	0	0	0	1	0	4	2	1	1	0	0	0	0	0	0
OTU_238	Fungi	Ascomycota	Dothideomycetes	Capnodiales	Mycosphaerellaceae	Mycosphaerellaceae_unidentified	Mycosphaerellaceae_sp|SH212680.06FU	0	0	0	0	7	2	11	0	0	1	0	0	1	0	0	0
OTU_239	Fungi	Basidiomycota	Agaricomycetes	Agaricales	Psathyrellaceae	Coprinopsis	Coprinopsis_urticicola|SH229042.06FU	1	0	2	0	2	1	1	1	0	2	0	0	0	0	0	0
OTU_240	Fungi	Unclassified	Unclassified	Unclassified	Unclassified	Unclassified	Unclassified	1	0	0	0	1	0	11	0	0	0	0	0	0	0	0	0
OTU_241	Fungi	Ascomycota	Sordariomycetes	Incertae_sedis_7	Glomerellaceae	Glomerellaceae_unidentified	Glomerellaceae_sp|SH233480.06FU	0	0	0	2	0	0	2	2	0	0	0	0	0	0	0	0
OTU_242	Fungi	Basidiomycota	Agaricomycetes	Agaricales	Psathyrellaceae	Coprinopsis	Unclassified	1	1	1	0	1	2	0	0	0	0	0	1	0	0	0	0
OTU_243	Fungi	Ascomycota	Eurotiomycetes	Chaetothyriales	Chaetothyriaceae	Chaetothyriaceae_unidentified	Chaetothyriaceae_sp|SH210957.06FU	0	3	0	0	1	1	0	0	1	1	1	1	0	0	0	1
OTU_244	Fungi	Ascomycota	Ascomycota_unidentified	Ascomycota_unidentified_1	Ascomycota_unidentified_1	Ascomycota_unidentified_1_1	Ascomycota_sp|SH211994.06FU	0	0	0	0	5	0	0	4	1	0	0	1	0	0	0	0
OTU_245	Fungi	Ascomycota	Eurotiomycetes	Chaetothyriales	Herpotrichiellaceae	Exophiala	Exophiala_brunnea|SH230205.06FU	0	1	0	0	0	0	0	0	1	1	0	2	1	1	1	0
OTU_246	Fungi	Ascomycota	Unclassified	Unclassified	Unclassified	Unclassified	Unclassified	2	0	0	1	1	0	0	0	0	1	0	0	0	0	0	0
OTU_247	Fungi	Ascomycota	Eurotiomycetes	Eurotiales	Trichocomaceae	Penicillium	Penicillium_citreonigrum|SH193628.06FU	0	0	2	2	1	0	0	0	0	0	0	0	0	0	0	0
OTU_248	Fungi	Ascomycota	Dothideomycetes	Pleosporales	Unclassified	Unclassified	Unclassified	1	0	0	0	2	0	0	0	0	1	1	1	0	0	0	0
OTU_249	Fungi	Ascomycota	Eurotiomycetes	Eurotiales	Trichocomaceae	Penicillium	Penicillium_virgatum|SH201030.06FU	0	0	0	0	3	0	0	0	0	1	1	0	0	0	0	0
OTU_250	Fungi	Ascomycota	Dothideomycetes	Capnodiales	Teratosphaeriaceae	Devriesia	Devriesia_xanthorrhoeae|SH189981.06FU	0	0	0	0	0	0	0	0	0	0	0	1	1	0	1	0
OTU_251	Fungi	Ascomycota	Ascomycota_unidentified	Ascomycota_unidentified_1	Ascomycota_unidentified_1	Ascomycota_unidentified_1_1	Ascomycota_sp|SH222567.06FU	0	0	1	1	0	0	0	0	0	0	0	1	0	0	0	0
OTU_252	Fungi	Unclassified	Unclassified	Unclassified	Unclassified	Unclassified	Unclassified	0	0	0	0	1	0	0	1	1	0	1	0	0	0	0	0
OTU_253	Fungi	Ascomycota	Unclassified	Unclassified	Unclassified	Unclassified	Unclassified	1	0	0	0	0	0	3	0	0	0	0	0	0	0	0	0
OTU_254	Fungi	Ascomycota	Ascomycota_unidentified	Ascomycota_unidentified_1	Ascomycota_unidentified_1	Ascomycota_unidentified_1_1	Ascomycota_sp|SH207005.06FU	0	0	1	0	6	0	2	3	2	3	1	4	0	1	0	0
OTU_255	Fungi	Basidiomycota	Microbotryomycetes	Sporidiobolales	Incertae_sedis_25	Rhodotorula	Unclassified	0	0	0	1	2	0	0	0	0	0	0	0	0	0	0	0
OTU_256	Fungi	Basidiomycota	Agaricomycetes	Agaricales	Psathyrellaceae	Psathyrellaceae_unidentified	Psathyrellaceae_sp|SH239392.06FU	0	0	0	1	0	0	0	0	1	1	1	3	0	0	0	0
OTU_257	Fungi	Ascomycota	Dothideomycetes	Pleosporales	Pleosporales_unidentified	Pleosporales_unidentified_1	Pleosporales_sp|SH240081.06FU	1	0	0	0	1	0	0	1	1	0	1	0	0	0	0	0
OTU_258	Fungi	Ascomycota	Sordariomycetes	Xylariales	Diatrypaceae	Unclassified	Unclassified	0	1	0	0	0	0	0	0	1	1	0	0	0	0	0	0
OTU_259	Fungi	Ascomycota	Unclassified	Unclassified	Unclassified	Unclassified	Unclassified	1	0	1	0	0	0	1	3	0	3	0	1	0	0	0	1
OTU_260	Fungi	Ascomycota	Dothideomycetes	Capnodiales	Davidiellaceae	Cladosporium	Cladosporium_sp_MPI04|SH196756.06FU	1	1	0	0	1	0	1	0	0	0	0	0	0	0	0	0
OTU_261	Fungi	Ascomycota	Sordariomycetes	Hypocreales	Nectriaceae	Nectriaceae_unidentified	Unclassified	2	0	1	0	0	0	0	1	0	1	0	0	0	0	0	0
OTU_262	Fungi	Basidiomycota	Microbotryomycetes	Sporidiobolales	Incertae_sedis_25	Rhodosporidium	Rhodosporidium_diobovatum|SH227205.06FU	0	1	0	0	1	0	0	0	0	0	0	2	0	0	0	0
OTU_263	Fungi	Basidiomycota	Microbotryomycetes	Sporidiobolales	Incertae_sedis_25	Sporobolomyces	Sporobolomyces_vermiculatus|SH227545.06FU	0	0	0	0	2	0	1	1	1	0	0	2	0	0	0	0
OTU_264	Fungi	Ascomycota	Sordariomycetes	Hypocreales	Hypocreales_unidentified	Hypocreales_unidentified_1	Unclassified	1	3	1	0	1	0	2	2	0	0	1	1	0	0	0	0
OTU_265	Fungi	Ascomycota	Dothideomycetes	Pleosporales	Pleosporaceae	Alternaria	Alternaria_solani|SH224793.06FU	0	0	0	0	1	0	0	2	0	0	0	0	0	0	0	0
OTU_266	Fungi	Basidiomycota	Agaricomycetes	Trechisporales	Hydnodontaceae	Trechispora	Trechispora_sp_2_MPM_2013|SH205729.06FU	1	1	2	0	0	2	0	1	1	0	1	1	0	0	0	1
OTU_267	Fungi	Ascomycota	Eurotiomycetes	Chaetothyriales	Chaetothyriaceae	Cyphellophora	Unclassified	1	0	1	0	1	0	0	0	0	0	0	0	1	0	0	0
OTU_268	Fungi	Fungi_unidentified	Fungi_unidentified_1	Fungi_unidentified_1	Fungi_unidentified_1_1	Fungi_unidentified_1_1	Fungi_sp|SH201526.06FU	0	0	0	1	0	0	0	3	0	0	1	0	0	0	0	0
OTU_269	Fungi	Ascomycota	Incertae_sedis_14	Incertae_sedis_15	Incertae_sedis_16	Unclassified	Unclassified	0	0	1	2	10	3	2	21	0	12	1	10	0	5	3	2
OTU_270	Fungi	Basidiomycota	Agaricomycetes	Polyporales	Meripilaceae	Meripilaceae_unidentified	Meripilaceae_sp|SH216848.06FU	1	0	2	0	0	0	0	0	0	0	0	0	0	0	0	0
OTU_271	Fungi	Ascomycota	Ascomycota_unidentified	Ascomycota_unidentified_1	Ascomycota_unidentified_1	Ascomycota_unidentified_1_1	Ascomycota_sp|SH215997.06FU	0	1	0	0	0	0	1	0	0	1	0	0	0	0	0	0
OTU_272	Fungi	Ascomycota	Dothideomycetes	Dothideomycetes_unidentified	Dothideomycetes_unidentified_1	Dothideomycetes_unidentified_1	Dothideomycetes_sp|SH223803.06FU	2	0	0	0	0	0	1	1	0	0	0	1	0	0	0	0
OTU_273	Fungi	Ascomycota	Ascomycota_unidentified	Ascomycota_unidentified_1	Ascomycota_unidentified_1	Ascomycota_unidentified_1_1	Ascomycota_sp|SH202146.06FU	10	12	25	11	15	0	7	44	24	12	13	30	10	19	12	14
OTU_274	Fungi	Basidiomycota	Agaricomycetes	Unclassified	Unclassified	Unclassified	Unclassified	2	0	0	0	0	0	1	0	0	1	1	0	0	1	0	0
OTU_275	Fungi	Ascomycota	Eurotiomycetes	Eurotiales	Trichocomaceae	Trichocomaceae_unidentified	Trichocomaceae_sp|SH201031.06FU	0	1	1	0	2	0	0	1	0	0	0	1	0	0	0	0
OTU_276	Fungi	Ascomycota	Dothideomycetes	Dothideomycetes_unidentified	Dothideomycetes_unidentified_1	Dothideomycetes_unidentified_1	Dothideomycetes_sp|SH224128.06FU	1	0	1	0	2	2	0	0	0	1	0	0	0	0	0	0
OTU_277	Fungi	Basidiomycota	Agaricomycetes	Agaricales	Psathyrellaceae	Coprinopsis	Coprinopsis_cinerea|SH208469.06FU	0	0	0	0	0	0	0	2	0	1	0	1	0	0	0	0
OTU_278	Fungi	Ascomycota	Ascomycota_unidentified	Ascomycota_unidentified_1	Ascomycota_unidentified_1	Ascomycota_unidentified_1_1	Ascomycota_sp|SH229418.06FU	0	0	0	0	0	1	7	1	1	0	0	0	0	1	0	0
OTU_279	Fungi	Ascomycota	Ascomycota_unidentified	Ascomycota_unidentified_1	Ascomycota_unidentified_1	Ascomycota_unidentified_1_1	Ascomycota_sp|SH211028.06FU	1	1	1	0	2	0	1	0	0	0	1	1	0	0	0	0
OTU_280	Fungi	Fungi_unidentified	Fungi_unidentified_1	Fungi_unidentified_1	Fungi_unidentified_1_1	Fungi_unidentified_1_1	Fungi_sp|SH234854.06FU	0	0	1	0	0	0	0	0	0	1	0	2	0	0	0	0
OTU_281	Fungi	Ascomycota	Dothideomycetes	Pleosporales	Pleosporales_unidentified	Pleosporales_unidentified_1	Pleosporales_sp|SH206981.06FU	45	39	24	24	39	38	36	56	15	129	25	64	28	33	16	17
OTU_282	Fungi	Ascomycota	Dothideomycetes	Pleosporales	Phaeosphaeriaceae	Stagonospora	Stagonospora_pseudovitensis|SH199974.06FU	0	0	0	0	0	0	1	0	1	1	1	0	0	0	0	0
OTU_283	Fungi	Ascomycota	Sordariomycetes	Hypocreales	Ophiocordycipitaceae	Purpureocillium	Purpureocillium_lavendulum|SH224001.06FU	0	1	0	0	0	1	1	1	0	0	0	0	0	0	0	0
OTU_284	Fungi	Ascomycota	Eurotiomycetes	Chaetothyriales	Herpotrichiellaceae	Herpotrichiellaceae_unidentified	Herpotrichiellaceae_sp|SH209738.06FU	0	0	0	1	0	0	0	3	2	0	1	1	0	0	1	0
OTU_285	Fungi	Basidiomycota	Agaricomycetes	Polyporales	Ganodermataceae	Ganoderma	Ganoderma_australe|SH232521.06FU	1	0	1	0	0	0	0	1	1	0	1	0	0	1	0	0
OTU_286	Fungi	Ascomycota	Sordariomycetes	Diaporthales	Gnomoniaceae	Ambarignomonia	Ambarignomonia_petiolorum|SH226153.06FU	0	0	0	1	1	0	1	0	1	0	0	0	0	0	0	0
OTU_287	Fungi	Ascomycota	Eurotiomycetes	Chaetothyriales	Herpotrichiellaceae	Exophiala	Exophiala_xenobiotica|SH210377.06FU	1	0	1	0	0	0	1	1	0	0	0	0	0	0	0	0
OTU_288	Fungi	Ascomycota	Sordariomycetes	Hypocreales	Nectriaceae	Gibberella	Gibberella_zeae|SH217300.06FU	0	0	0	0	1	1	6	1	0	0	1	0	0	0	0	0
OTU_289	Fungi	Ascomycota	Eurotiomycetes	Chaetothyriales	Chaetothyriales_unidentified	Chaetothyriales_unidentified_1	Chaetothyriales_sp|SH230055.06FU	0	0	0	0	2	0	0	1	1	0	0	0	1	0	0	0
OTU_290	Fungi	Ascomycota	Dothideomycetes	Myriangiales	Myriangiales_unidentified	Myriangiales_unidentified_1	Myriangiales_sp|SH230159.06FU	0	1	0	0	0	0	0	0	0	0	0	1	0	0	0	0
OTU_291	Fungi	Basidiomycota	Agaricomycetes	Hymenochaetales	Schizoporaceae	Schizopora	Schizopora_flavipora|SH204969.06FU	0	0	2	0	0	0	0	0	2	0	0	1	0	0	1	0
OTU_292	Fungi	Ascomycota	Sordariomycetes	Sordariomycetes_unidentified	Sordariomycetes_unidentified_1	Sordariomycetes_unidentified_1	Sordariomycetes_sp|SH232118.06FU	0	0	0	0	0	0	0	0	1	0	0	1	0	0	0	0
OTU_293	Fungi	Chytridiomycota	Chytridiomycetes	Rhizophlyctidales	Rhizophlyctidaceae	Rhizophlyctis	Rhizophlyctis_rosea|SH229691.06FU	0	0	0	0	0	0	0	0	0	0	0	0	0	0	0	3
OTU_294	Fungi	Ascomycota	Ascomycota_unidentified	Ascomycota_unidentified_1	Ascomycota_unidentified_1	Ascomycota_unidentified_1_1	Ascomycota_sp|SH213440.06FU	0	0	0	0	0	0	0	1	0	1	0	0	0	0	0	0
OTU_295	Fungi	Ascomycota	Sordariomycetes	Hypocreales	Cordycipitaceae	Isaria	Isaria_javanica|SH196292.06FU	0	0	0	0	0	0	0	0	0	0	0	0	1	0	0	1
OTU_296	Fungi	Ascomycota	Dothideomycetes	Pleosporales	Phaeosphaeriaceae	Phaeosphaeria	Phaeosphaeria_phragmiticola|SH199979.06FU	0	0	0	0	0	0	0	0	0	0	0	1	0	1	0	0
OTU_297	Fungi	Ascomycota	Sordariomycetes	Sordariales	Chaetomiaceae	Chaetomiaceae_unidentified	Chaetomiaceae_sp|SH230790.06FU	0	0	0	0	0	0	0	0	1	1	0	0	0	0	0	1
OTU_298	Fungi	Basidiomycota	Agaricomycetes	Agaricomycetes_unidentified	Agaricomycetes_unidentified_1	Agaricomycetes_unidentified_1	Agaricomycetes_sp|SH199701.06FU	1	0	1	1	1	0	1	0	0	1	1	0	0	0	0	0
OTU_299	Fungi	Ascomycota	Dothideomycetes	Pleosporales	Pleosporales_unidentified	Pleosporales_unidentified_1	Pleosporales_sp|SH209063.06FU	0	0	1	0	4	0	7	1	0	1	0	0	0	0	0	0
OTU_300	Fungi	Basidiomycota	Tremellomycetes	Tremellales	Incertae_sedis_12	Dioszegia	Dioszegia_takashimae|SH196965.06FU	0	0	0	0	0	1	3	0	1	0	0	2	0	0	0	0
OTU_301	Fungi	Ascomycota	Sordariomycetes	Sordariomycetes_unidentified	Sordariomycetes_unidentified_1	Sordariomycetes_unidentified_1	Unclassified	1	0	0	0	1	0	0	1	0	1	0	0	0	1	0	0
OTU_302	Fungi	Ascomycota	Eurotiomycetes	Chaetothyriales	Herpotrichiellaceae	Exophiala	Exophiala_jeanselmei|SH210381.06FU	0	0	0	0	0	0	1	1	0	0	0	0	0	0	0	0
OTU_303	Fungi	Unclassified	Unclassified	Unclassified	Unclassified	Unclassified	Unclassified	1	1	0	2	1	0	0	0	0	0	0	0	0	1	0	1
OTU_304	Fungi	Ascomycota	Eurotiomycetes	Eurotiales	Trichocomaceae	Talaromyces	Talaromyces_marneffei|SH225847.06FU	0	0	0	1	0	0	0	1	0	0	0	0	0	0	0	0
OTU_305	Fungi	Basidiomycota	Ustilaginomycetes	Ustilaginales	Ustilaginaceae	Ustilaginaceae_unidentified	Ustilaginaceae_sp|SH237196.06FU	1	1	0	0	0	0	0	0	0	1	0	0	0	0	0	0
OTU_306	Fungi	Basidiomycota	Agaricomycetes	Agaricomycetes_unidentified	Agaricomycetes_unidentified_1	Agaricomycetes_unidentified_1	Agaricomycetes_sp|SH234602.06FU	1	0	0	0	1	0	0	0	0	0	0	0	0	0	0	0
OTU_307	Fungi	Ascomycota	Sordariomycetes	Hypocreales	Incertae_sedis_3	Myrothecium	Myrothecium_sp_HZ_6|SH199487.06FU	0	0	0	0	0	1	0	3	0	1	0	2	0	0	0	0
OTU_308	Fungi	Ascomycota	Sordariomycetes	Xylariales	Diatrypaceae	Diatrypaceae_unidentified	Diatrypaceae_sp|SH202093.06FU	0	0	0	0	0	0	0	0	0	2	0	0	0	0	0	0
OTU_309	Fungi	Ascomycota	Leotiomycetes	Helotiales	Unclassified	Unclassified	Unclassified	1	0	0	0	3	0	0	6	0	2	1	2	0	1	0	0
OTU_310	Fungi	Ascomycota	Dothideomycetes	Pleosporales	Pleosporaceae	Embellisia	Embellisia_planifunda|SH224790.06FU	0	0	0	0	2	0	0	0	0	1	0	1	0	0	0	0
OTU_311	Fungi	Basidiomycota	Agaricomycetes	Corticiales	Corticiales_unidentified	Corticiales_unidentified_1	Corticiales_sp|SH227919.06FU	2	2	1	0	2	1	1	0	0	3	0	2	1	0	0	0
OTU_312	Fungi	Ascomycota	Sordariomycetes	Sordariomycetes_unidentified	Sordariomycetes_unidentified_1	Sordariomycetes_unidentified_1	Sordariomycetes_sp|SH219632.06FU	0	0	0	0	3	2	4	1	0	2	0	0	0	1	0	1
OTU_313	Fungi	Basidiomycota	Agaricomycetes	Polyporales	Polyporaceae	Polyporaceae_unidentified	Polyporaceae_sp|SH226698.06FU	0	0	1	0	2	0	0	0	0	0	0	0	0	0	0	1
OTU_314	Fungi	Ascomycota	Saccharomycetes	Saccharomycetales	Incertae_sedis_11	Debaryomyces	Debaryomyces_prosopidis|SH213690.06FU	0	2	0	0	0	0	0	0	0	0	0	0	0	0	1	0
OTU_315	Fungi	Ascomycota	Leotiomycetes	Helotiales	Helotiales_unidentified	Helotiales_unidentified_1	Helotiales_sp|SH191096.06FU	0	0	0	1	3	0	1	1	1	0	0	0	0	0	1	1
OTU_316	Fungi	Ascomycota	Dothideomycetes	Patellariales	Patellariaceae	Rhytidhysteron	Rhytidhysteron_rufulum|SH239316.06FU	0	0	0	0	1	0	1	0	0	0	0	0	0	0	0	0
OTU_317	Fungi	Ascomycota	Ascomycota_unidentified	Ascomycota_unidentified_1	Ascomycota_unidentified_1	Ascomycota_unidentified_1_1	Ascomycota_sp|SH190182.06FU	0	0	1	0	0	0	0	0	0	0	0	1	0	0	0	0
OTU_318	Fungi	Ascomycota	Unclassified	Unclassified	Unclassified	Unclassified	Unclassified	0	0	0	1	0	0	0	0	0	0	0	1	0	0	0	0
OTU_319	Fungi	Ascomycota	Sordariomycetes	Xylariales	Amphisphaeriaceae	Pestalotiopsis	Unclassified	0	1	0	0	0	0	0	0	0	0	0	1	0	0	0	0
OTU_320	Fungi	Basidiomycota	Basidiomycota_unidentified	Basidiomycota_unidentified_1	Basidiomycota_unidentified_1	Basidiomycota_unidentified_1_1	Basidiomycota_sp|SH239325.06FU	0	1	1	1	0	0	0	2	0	0	0	0	0	0	0	0
OTU_321	Fungi	Unclassified	Unclassified	Unclassified	Unclassified	Unclassified	Unclassified	0	0	0	0	0	0	3	0	0	0	0	0	0	0	0	0
OTU_322	Fungi	Ascomycota	Sordariomycetes	Unclassified	Unclassified	Unclassified	Unclassified	0	0	0	0	1	0	0	1	0	0	0	0	0	0	0	0
OTU_323	Fungi	Basidiomycota	Ustilaginomycetes	Ustilaginales	Ustilaginaceae	Ustilaginaceae_unidentified	Unclassified	0	0	0	0	1	0	0	0	0	0	0	0	1	0	0	0
OTU_324	Fungi	Ascomycota	Dothideomycetes	Pleosporales	Unclassified	Unclassified	Unclassified	0	0	0	0	1	0	0	0	0	1	0	0	0	0	0	0
OTU_325	Fungi	Basidiomycota	Basidiomycota_unidentified	Basidiomycota_unidentified_1	Basidiomycota_unidentified_1	Basidiomycota_unidentified_1_1	Basidiomycota_sp|SH239325.06FU	0	0	1	2	3	1	12	0	0	0	0	0	0	0	0	2
OTU_326	Fungi	Ascomycota	Sordariomycetes	Hypocreales	Hypocreales_unidentified	Hypocreales_unidentified_1	Unclassified	1	1	1	0	0	0	0	0	0	0	0	1	0	0	0	0
OTU_327	Fungi	Ascomycota	Ascomycota_unidentified	Ascomycota_unidentified_1	Ascomycota_unidentified_1	Ascomycota_unidentified_1_1	Ascomycota_sp|SH214041.06FU	0	1	0	0	0	0	0	0	0	0	0	1	0	0	0	0
OTU_328	Fungi	Ascomycota	Ascomycota_unidentified	Ascomycota_unidentified_1	Ascomycota_unidentified_1	Ascomycota_unidentified_1_1	Ascomycota_sp|SH211994.06FU	0	0	0	0	2	0	0	0	0	0	0	0	0	0	0	0
OTU_329	Fungi	Ascomycota	Sordariomycetes	Hypocreales	Incertae_sedis_3	Incertae_sedis_3_unidentified	Hypocreales_sp|SH223990.06FU	0	0	0	1	0	0	0	0	0	1	0	0	0	0	0	0
OTU_330	Fungi	Ascomycota	Sordariomycetes	Sordariomycetes_unidentified	Sordariomycetes_unidentified_1	Sordariomycetes_unidentified_1	Sordariomycetes_sp|SH212492.06FU	0	1	0	0	1	0	0	1	1	1	1	0	0	0	1	0
OTU_331	Fungi	Ascomycota	Dothideomycetes	Dothideomycetes_unidentified	Dothideomycetes_unidentified_1	Dothideomycetes_unidentified_1	Dothideomycetes_sp|SH206996.06FU	0	1	0	1	0	0	0	0	0	0	0	0	0	0	0	0
OTU_332	Fungi	Ascomycota	Unclassified	Unclassified	Unclassified	Unclassified	Unclassified	1	0	1	0	1	3	2	0	0	0	0	0	1	0	0	0
OTU_333	Fungi	Ascomycota	Sordariomycetes	Unclassified	Unclassified	Unclassified	Unclassified	0	0	1	0	0	0	0	0	0	0	0	0	0	0	2	0
OTU_334	Fungi	Ascomycota	Dothideomycetes	Pleosporales	Pleosporaceae	Pleosporaceae_unidentified	Pleosporaceae_sp|SH224827.06FU	0	0	0	0	0	0	0	0	1	0	0	1	0	0	0	0
OTU_335	Fungi	Ascomycota	Dothideomycetes	Pleosporales	Pleosporales_unidentified	Pleosporales_unidentified_1	Pleosporales_sp|SH232017.06FU	0	0	0	0	0	0	0	0	0	2	0	0	0	0	0	0
OTU_336	Fungi	Ascomycota	Eurotiomycetes	Chaetothyriales	Herpotrichiellaceae	Exophiala	Exophiala_brunnea|SH230205.06FU	1	0	4	0	0	0	1	0	0	5	0	3	0	0	0	0
OTU_337	Fungi	Unclassified	Unclassified	Unclassified	Unclassified	Unclassified	Unclassified	0	0	0	0	0	0	2	0	0	0	0	0	0	0	0	0
OTU_338	Fungi	Ascomycota	Eurotiomycetes	Chaetothyriales	Incertae_sedis_42	Strelitziana	Strelitziana_africana|SH211992.06FU	0	0	1	0	3	0	2	2	0	0	0	0	0	2	0	0
OTU_339	Fungi	Ascomycota	Dothideomycetes	Pleosporales	Pleosporaceae	Pleosporaceae_unidentified	Pleosporaceae_sp|SH224795.06FU	1	0	0	0	1	0	0	0	0	0	0	0	0	0	0	0
OTU_340	Fungi	Ascomycota	Dothideomycetes	Pleosporales	Pleosporaceae	Pleosporaceae_unidentified	Pleosporaceae_sp|SH224811.06FU	0	0	0	0	0	1	0	0	0	1	0	0	0	0	0	0
OTU_341	Fungi	Basidiomycota	Agaricomycetes	Agaricales	Psathyrellaceae	Coprinellus	Coprinellus_pallidus|SH199667.06FU	0	0	0	0	0	0	1	0	1	0	0	0	0	0	0	0
OTU_342	Fungi	Fungi_unidentified	Fungi_unidentified_1	Fungi_unidentified_1	Fungi_unidentified_1_1	Fungi_unidentified_1_1	Fungi_sp|SH213113.06FU	0	0	1	0	1	0	0	0	0	0	0	0	0	0	0	0
OTU_343	Fungi	Ascomycota	Ascomycota_unidentified	Ascomycota_unidentified_1	Ascomycota_unidentified_1	Ascomycota_unidentified_1_1	Ascomycota_sp|SH213531.06FU	0	0	0	0	2	0	0	0	0	0	0	0	0	0	0	0
OTU_344	Fungi	Basidiomycota	Agaricomycetes	Agaricomycetes_unidentified	Agaricomycetes_unidentified_1	Agaricomycetes_unidentified_1	Agaricomycetes_sp|SH214477.06FU	0	0	0	0	0	0	2	0	0	0	0	0	0	0	0	0
OTU_345	Fungi	Ascomycota	Eurotiomycetes	Chaetothyriales	Chaetothyriales_unidentified	Chaetothyriales_unidentified_1	Chaetothyriales_sp|SH232791.06FU	0	0	0	1	2	0	0	3	0	3	0	3	1	0	0	1
OTU_346	Fungi	Ascomycota	Dothideomycetes	Myriangiales	Myriangiales_unidentified	Myriangiales_unidentified_1	Myriangiales_sp|SH230159.06FU	0	1	1	0	0	0	1	1	0	0	0	1	0	0	0	0
OTU_347	Fungi	Zygomycota	Incertae_sedis_10	Mucorales	Lichtheimiaceae	Rhizomucor	Rhizomucor_pusillus|SH218707.06FU	0	0	0	0	0	0	0	0	0	0	1	1	0	0	0	0
OTU_348	Fungi	Ascomycota	Dothideomycetes	Pleosporales	Unclassified	Unclassified	Unclassified	1	0	0	0	0	1	0	0	0	0	0	0	0	0	0	0
OTU_349	Fungi	Basidiomycota	Agaricomycetes	Agaricomycetes_unidentified	Agaricomycetes_unidentified_1	Agaricomycetes_unidentified_1	Agaricomycetes_sp|SH205076.06FU	1	1	0	1	0	0	0	0	0	0	0	0	0	1	0	1
OTU_350	Fungi	Ascomycota	Dothideomycetes	Incertae_sedis_8	Incertae_sedis_19	Leptospora	Leptospora_rubella|SH213116.06FU	0	0	0	0	0	0	1	0	0	1	0	0	0	0	0	0
OTU_351	Fungi	Ascomycota	Eurotiomycetes	Chaetothyriales	Chaetothyriales_unidentified	Chaetothyriales_unidentified_1	Chaetothyriales_sp|SH219207.06FU	0	0	0	0	1	0	0	0	1	1	0	0	0	0	0	0
OTU_352	Fungi	Ascomycota	Eurotiomycetes	Eurotiales	Trichocomaceae	Penicillium	Penicillium_chrysogenum|SH214177.06FU	0	2	0	1	1	0	0	0	0	1	0	0	0	0	0	0
OTU_353	Fungi	Ascomycota	Eurotiomycetes	Eurotiales	Trichocomaceae	Talaromyces	Talaromyces_coalescens|SH218647.06FU	0	0	0	0	0	0	0	0	1	0	0	0	1	0	0	0
OTU_354	Fungi	Ascomycota	Sordariomycetes	Diaporthales	Diaporthaceae	Diaporthe	Unclassified	0	0	0	1	0	0	1	0	0	0	0	0	0	0	0	0
OTU_355	Fungi	Ascomycota	Ascomycota_unidentified	Ascomycota_unidentified_1	Ascomycota_unidentified_1	Ascomycota_unidentified_1_1	Ascomycota_sp|SH196232.06FU	0	0	0	0	0	0	0	0	0	0	0	2	0	0	0	0
OTU_356	Fungi	Ascomycota	Dothideomycetes	Dothideomycetes_unidentified	Dothideomycetes_unidentified_1	Dothideomycetes_unidentified_1	Unclassified	0	1	1	0	0	0	1	0	0	0	0	1	0	0	0	0
OTU_357	Fungi	Basidiomycota	Agaricomycetes	Polyporales	Meruliaceae	Phlebia	Phlebia_sp|SH226409.06FU	0	0	1	0	0	0	0	0	0	2	0	0	0	0	0	0
OTU_358	Fungi	Ascomycota	Dothideomycetes	Capnodiales	Incertae_sedis_17	Toxicocladosporium	Toxicocladosporium_strelitziae|SH196751.06FU	0	0	0	0	0	0	5	0	0	1	0	0	0	0	0	0
OTU_359	Fungi	Ascomycota	Dothideomycetes	Pleosporales	Pleosporales_unidentified	Pleosporales_unidentified_1	Pleosporales_sp|SH211756.06FU	0	0	0	0	0	0	0	0	1	0	0	0	1	0	0	0
OTU_360	Fungi	Basidiomycota	Agaricomycetes	Agaricales	Unclassified	Unclassified	Unclassified	1	0	1	0	0	0	0	0	0	0	0	0	0	0	0	0
OTU_361	Fungi	Ascomycota	Eurotiomycetes	Chaetothyriales	Chaetothyriaceae	Cyphellophora	Unclassified	0	0	0	0	2	0	0	0	0	0	0	0	0	0	0	0
OTU_362	Fungi	Basidiomycota	Agaricomycetes	Agaricomycetes_unidentified	Agaricomycetes_unidentified_1	Agaricomycetes_unidentified_1	Agaricomycetes_sp|SH214775.06FU	1	1	0	1	0	0	0	0	0	0	0	0	0	0	0	0
OTU_363	Fungi	Basidiomycota	Exobasidiomycetes	Entylomatales	Entylomatales_unidentified	Entylomatales_unidentified_1	Entylomatales_sp|SH228439.06FU	0	1	0	0	1	0	0	0	0	0	0	0	0	0	0	0
OTU_364	Fungi	Ascomycota	Dothideomycetes	Incertae_sedis_8	Incertae_sedis_19	Leptospora	Leptospora_rubella|SH213116.06FU	0	0	1	0	1	0	0	0	0	0	0	0	0	0	0	0
OTU_365	Fungi	Ascomycota	Sordariomycetes	Sordariales	Chaetomiaceae	Chaetomiaceae_unidentified	Chaetomiaceae_sp|SH230790.06FU	0	0	1	0	0	0	0	1	0	0	0	0	0	0	0	0
OTU_366	Fungi	Ascomycota	Unclassified	Unclassified	Unclassified	Unclassified	Unclassified	1	0	0	0	0	1	0	0	0	0	0	1	0	0	0	0
OTU_367	Fungi	Ascomycota	Eurotiomycetes	Eurotiales	Trichocomaceae	Penicillium	Penicillium_sumatrense|SH213187.06FU	0	1	2	0	0	0	1	1	0	0	0	0	0	0	0	0
OTU_368	Fungi	Ascomycota	Sordariomycetes	Diaporthales	Diaporthaceae	Diaporthaceae_unidentified	Diaporthaceae_sp|SH213537.06FU	0	0	0	1	0	1	0	0	0	0	0	0	0	0	0	0
OTU_369	Fungi	Basidiomycota	Agaricomycetes	Agaricales	Pleurotaceae	Hohenbuehelia	Hohenbuehelia_portegna|SH201396.06FU	0	0	0	0	0	0	0	0	0	1	0	2	0	0	0	0
OTU_370	Fungi	Fungi_unidentified	Fungi_unidentified_1	Fungi_unidentified_1	Fungi_unidentified_1_1	Fungi_unidentified_1_1	Fungi_sp|SH201526.06FU	1	0	0	0	0	1	0	0	0	1	0	0	0	0	0	0
OTU_371	Fungi	Ascomycota	Ascomycota_unidentified	Ascomycota_unidentified_1	Ascomycota_unidentified_1	Ascomycota_unidentified_1_1	Ascomycota_sp|SH191577.06FU	0	0	0	0	2	0	1	0	0	0	0	1	1	0	0	0
OTU_372	Fungi	Ascomycota	Dothideomycetes	Botryosphaeriales	Botryosphaeriaceae	Pseudofusicoccum	Pseudofusicoccum_stromaticum|SH236110.06FU	1	0	0	0	0	0	1	0	0	0	0	0	0	0	0	0
OTU_373	Fungi	Ascomycota	Dothideomycetes	Pleosporales	Pleosporales_unidentified	Pleosporales_unidentified_1	Pleosporales_sp|SH236254.06FU	0	0	0	0	1	0	0	0	0	1	0	1	0	0	0	0
OTU_374	Fungi	Ascomycota	Eurotiomycetes	Chaetothyriales	Herpotrichiellaceae	Exophiala	Exophiala_sp|SH222159.06FU	0	0	0	1	1	0	0	0	0	0	0	0	0	0	0	0
OTU_375	Fungi	Basidiomycota	Agaricomycetes	Agaricales	Psathyrellaceae	Coprinellus	Coprinellus_canistri|SH199688.06FU	1	0	0	0	0	0	0	1	0	0	0	1	0	0	0	0
OTU_376	Fungi	Basidiomycota	Tremellomycetes	Tremellales	Incertae_sedis_12	Dioszegia	Unclassified	0	0	0	1	0	0	0	0	0	0	1	0	0	0	0	0
OTU_377	Fungi	Ascomycota	Unclassified	Unclassified	Unclassified	Unclassified	Unclassified	0	0	0	1	1	0	1	0	0	0	0	0	0	0	0	0
OTU_378	Fungi	Ascomycota	Sordariomycetes	Incertae_sedis_7	Glomerellaceae	Colletotrichum	Colletotrichum_fuscum|SH229540.06FU	0	0	1	0	0	0	0	2	0	0	0	0	0	0	0	0
OTU_379	Fungi	Ascomycota	Dothideomycetes	Unclassified	Unclassified	Unclassified	Unclassified	0	0	0	0	0	0	1	0	0	1	0	1	0	0	0	0
OTU_380	Fungi	Ascomycota	Eurotiomycetes	Eurotiales	Trichocomaceae	Penicillium	Penicillium_corylophilum|SH231335.06FU	0	0	0	0	1	0	0	0	0	2	0	1	0	0	0	0
OTU_381	Fungi	Ascomycota	Dothideomycetes	Pleosporales	Montagnulaceae	Paraconiothyrium	Paraconiothyrium_variabile|SH224124.06FU	1	1	0	0	0	0	0	0	0	3	0	0	0	0	0	0
OTU_382	Fungi	Ascomycota	Dothideomycetes	Incertae_sedis_8	Pseudeurotiaceae	Pseudeurotiaceae_unidentified	Pseudeurotiaceae_sp|SH222309.06FU	1	0	0	0	0	0	0	0	0	0	0	1	0	0	0	0
OTU_383	Fungi	Ascomycota	Unclassified	Unclassified	Unclassified	Unclassified	Unclassified	0	0	0	0	0	0	0	1	0	0	0	1	0	0	1	0
OTU_384	Fungi	Basidiomycota	Agaricomycetes	Agaricomycetes_unidentified	Agaricomycetes_unidentified_1	Agaricomycetes_unidentified_1	Unclassified	0	0	0	0	0	0	0	0	0	0	1	1	0	0	0	0
OTU_385	Fungi	Ascomycota	Ascomycota_unidentified	Ascomycota_unidentified_1	Ascomycota_unidentified_1	Ascomycota_unidentified_1_1	Ascomycota_sp|SH196179.06FU	0	0	0	0	0	0	0	1	1	0	0	0	0	1	0	0
OTU_386	Fungi	Basidiomycota	Agaricomycetes	Agaricomycetes_unidentified	Agaricomycetes_unidentified_1	Agaricomycetes_unidentified_1	Agaricomycetes_sp|SH214757.06FU	2	1	0	0	0	0	0	0	0	0	0	0	0	0	0	0
OTU_387	Fungi	Basidiomycota	Agaricomycetes	Agaricales	Agaricaceae	Agaricus	Agaricus_aff_placomyces_ML_5|SH237697.06FU	0	0	1	0	1	0	1	0	0	0	0	0	0	0	0	0
OTU_388	Fungi	Ascomycota	Ascomycota_unidentified	Ascomycota_unidentified_1	Ascomycota_unidentified_1	Ascomycota_unidentified_1_1	Ascomycota_sp|SH224125.06FU	0	0	1	1	7	1	1	20	0	12	0	17	1	0	0	1
OTU_389	Fungi	Basidiomycota	Unclassified	Unclassified	Unclassified	Unclassified	Unclassified	0	0	0	0	1	0	0	0	0	0	0	1	0	0	0	0
OTU_390	Fungi	Basidiomycota	Agaricomycetes	Russulales	Russulaceae	Russula	Russula_virescens|SH198244.06FU	0	0	0	0	0	0	0	0	0	0	0	0	0	0	2	0
OTU_391	Fungi	Ascomycota	Sordariomycetes	Diaporthales	Diaporthaceae	Diaporthaceae_unidentified	Diaporthaceae_sp|SH194765.06FU	1	1	1	1	3	0	1	0	1	2	1	0	0	1	0	0
OTU_392	Fungi	Ascomycota	Ascomycota_unidentified	Ascomycota_unidentified_1	Ascomycota_unidentified_1	Ascomycota_unidentified_1_1	Ascomycota_sp|SH191099.06FU	0	0	0	1	0	0	0	0	0	0	0	0	1	0	0	0
OTU_393	Fungi	Ascomycota	Unclassified	Unclassified	Unclassified	Unclassified	Unclassified	0	0	0	0	0	0	1	0	0	0	0	2	0	0	0	0
OTU_394	Fungi	Fungi_unidentified	Fungi_unidentified_1	Fungi_unidentified_1	Fungi_unidentified_1_1	Fungi_unidentified_1_1	Fungi_sp|SH201526.06FU	0	0	1	0	1	0	0	2	0	1	0	1	0	0	0	0
OTU_395	Fungi	Ascomycota	Dothideomycetes	Botryosphaeriales	Botryosphaeriaceae	Neofusicoccum	Neofusicoccum_mangiferae|SH206852.06FU	0	0	2	0	0	0	0	0	0	0	0	0	0	0	0	0
OTU_396	Fungi	Basidiomycota	Tremellomycetes	Tremellales	Incertae_sedis_12	Cryptococcus_1	Cryptococcus_aff_taibaiensis_IMUFRJ_51982|SH198061.06FU	0	1	2	1	0	0	0	0	0	0	0	0	0	0	0	0
OTU_397	Fungi	Ascomycota	Sordariomycetes	Xylariales	Incertae_sedis_9	Microdochium	Microdochium_dimerum|SH217358.06FU	0	1	1	0	5	0	4	1	0	1	0	0	0	0	0	0
OTU_398	Fungi	Ascomycota	Dothideomycetes	Pleosporales	Incertae_sedis_13	Neophaeosphaeria	Neophaeosphaeria_sp|SH227214.06FU	0	0	0	0	0	0	1	1	0	0	0	1	0	0	0	0
OTU_399	Fungi	Ascomycota	Sordariomycetes	Incertae_sedis_7	Incertae_sedis_31	Myrmecridium	Myrmecridium_sp|SH189851.06FU	0	0	0	0	0	0	0	1	0	3	0	0	0	0	0	1
